# Supplementary material for: Platinum thiolate complexes supported by PBP and POCOP pincer ligands as efficient catalysts for the hydrosilylation of carbonyl compounds
Source: Royal Society of Chemistry journal article supplement (doi:10.1039/d1dt04179g), 2022-01-01
Supplement: d1dt04179g1.pdf [file d1dt04179g1.pdf]

## Electronic Supplementary Information

### Platinum thiolate complexes supported by PBP and POCOP pincer ligands as efficient catalysts for hydrosilylation of carbonyl compounds

Man-Man Xue,<sup>a</sup> Jiarui Chang,<sup>a</sup> Jie Zhang\*<sup>a</sup> and Xuenian Chen\*<sup>a,b</sup>

<sup>a</sup> Henan Key Laboratory of Boron Chemistry and Advanced Energy Materials, Key Laboratory of Green Chemical Media and Reactions, Ministry of Education, Collaborative Innovation Centre of Henan Province for Green Manufacturing of Fine Chemicals, School of Chemistry and Chemical Engineering, Henan Normal University, Xixiang, Henan 453007, China. E-mail: jie.zhang@htu.edu.cn, xnchen@htu.edu.cn.

<sup>b</sup> College of Chemistry and Molecular Engineering, Zhengzhou University Zhengzhou, Henan 450001, China.

#### Contents

|                                                                                                                     |         |
|---------------------------------------------------------------------------------------------------------------------|---------|
| NMR spectra of complexes <b>1a,b</b> and <b>2a,b</b> ( <b>Fig. S1–S15</b> ).....                                    | S2–S9   |
| The profile of conversion-time for hydrosilylation of benzaldehyde with PhSiH <sub>3</sub> ( <b>Fig. S16</b> )..... | S9      |
| <sup>31</sup> P{ <sup>1</sup> H} NMR spectra of the hydrosilylation reaction mixture ( <b>Fig. S17</b> ).....       | S10     |
| TOFs of Pt-catalyst systems for hydrosilylation of carbonyl compounds ( <b>Table S1</b> ).....                      | S11     |
| Summary of crystal data and structure refinement for <b>1a,b</b> and <b>2a,b</b> ( <b>Tables S2 and S3</b> ).....   | S11–S12 |
| Characterization and NMR spectra ( <b>Fig. S18–S73</b> ) of the isolated alcoholic products.....                    | S13–S40 |
| Reference.....                                                                                                      | S41     |

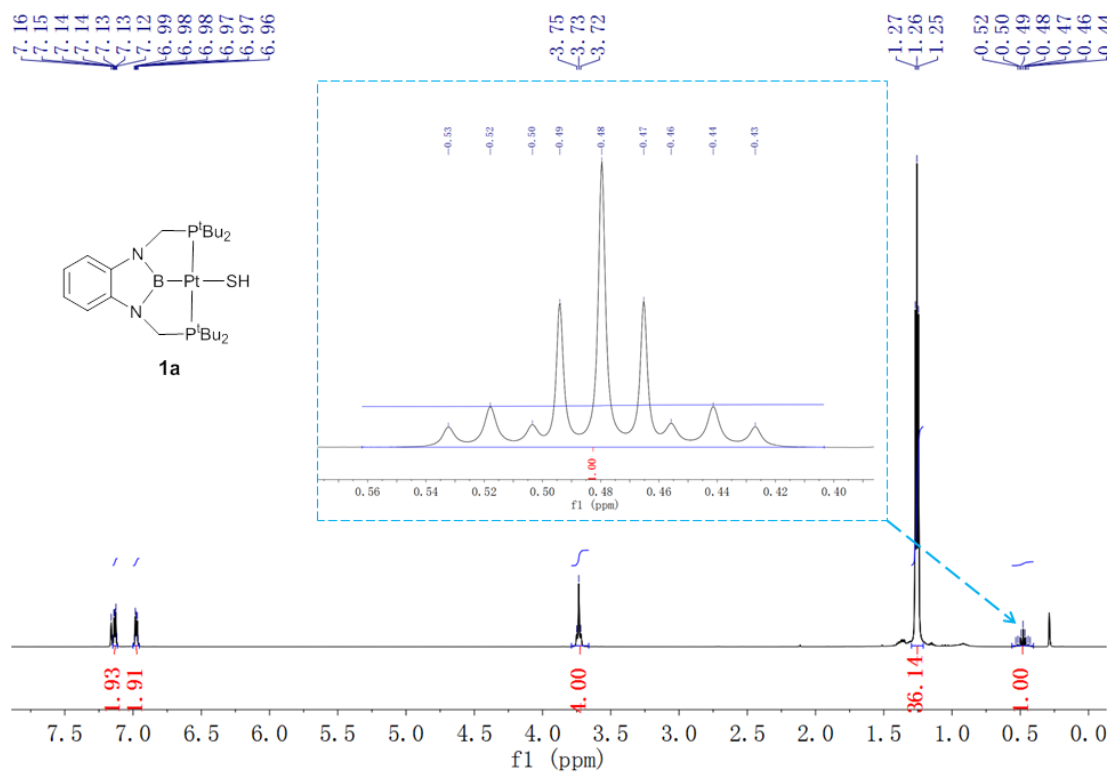

**Fig. S1**  $^1\text{H}$  NMR spectrum of complex **1a** (600 MHz,  $\text{C}_6\text{D}_6$ )

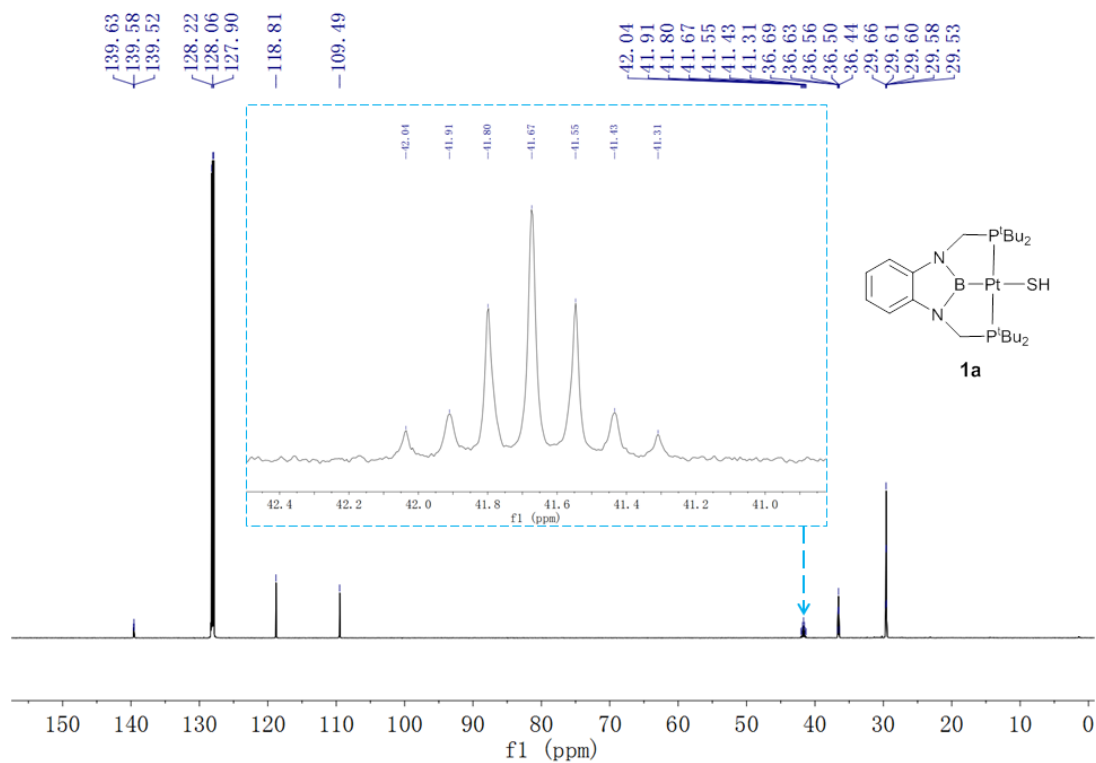

**Fig. S2**  $^{13}\text{C}\{^1\text{H}\}$  NMR spectrum of complex **1a** (151 MHz,  $\text{C}_6\text{D}_6$ )

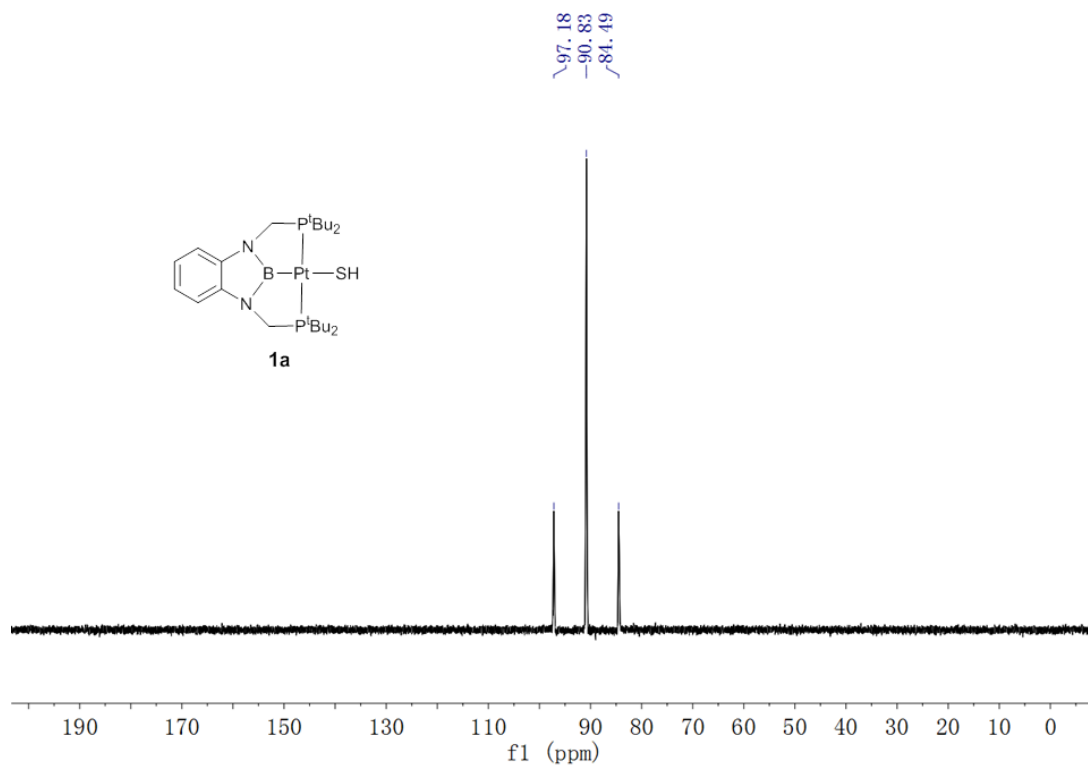

**Fig. S3** <sup>31</sup>P{<sup>1</sup>H} NMR spectrum of complex **1a** (243 Hz, C<sub>6</sub>D<sub>6</sub>)

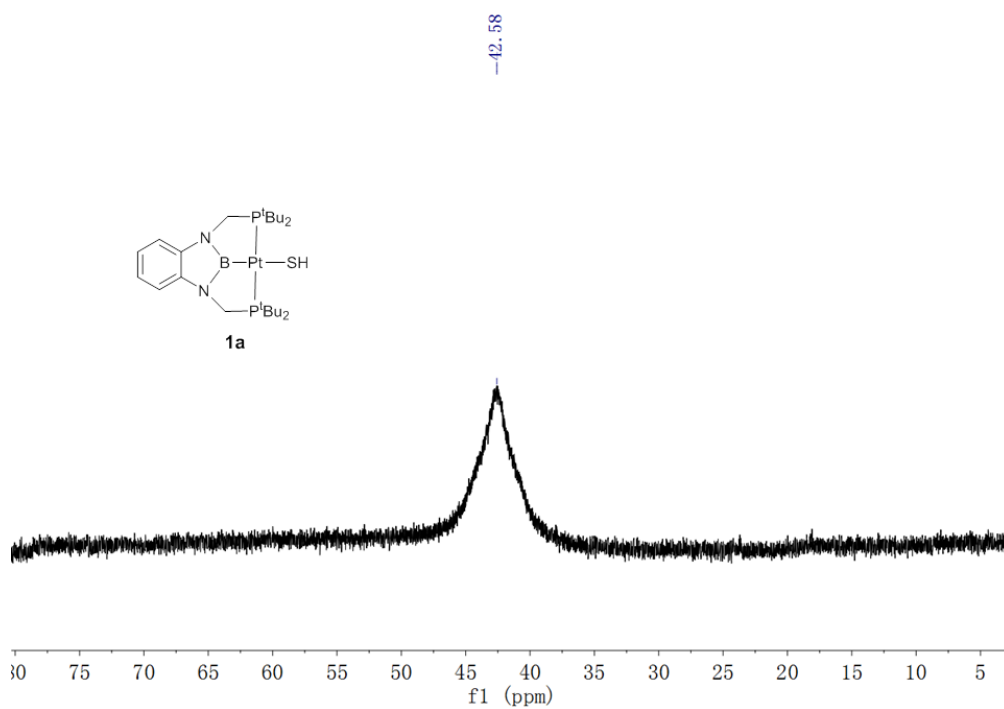

**Fig. S4** <sup>11</sup>B NMR spectrum of complex **1a** (193 Hz, C<sub>6</sub>D<sub>6</sub>)

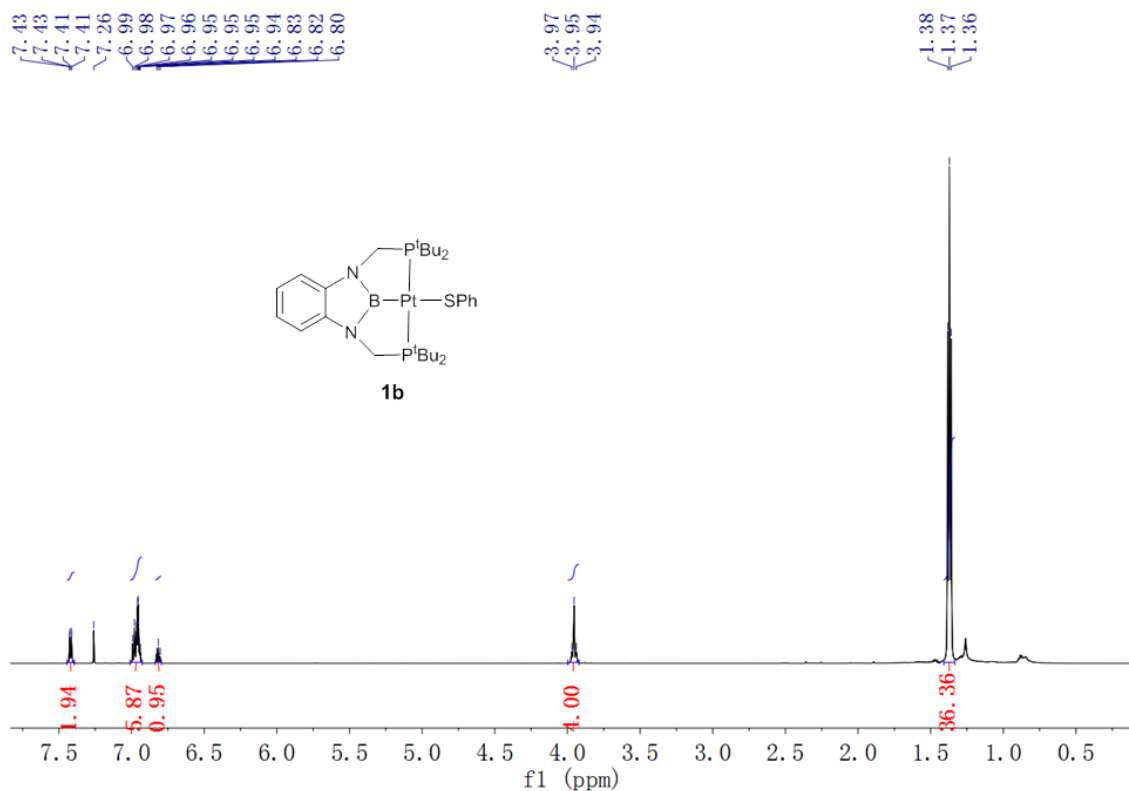

**Fig. S5**  $^1\text{H}$  NMR spectrum of complex **1b** (600 MHz,  $\text{CDCl}_3$ )

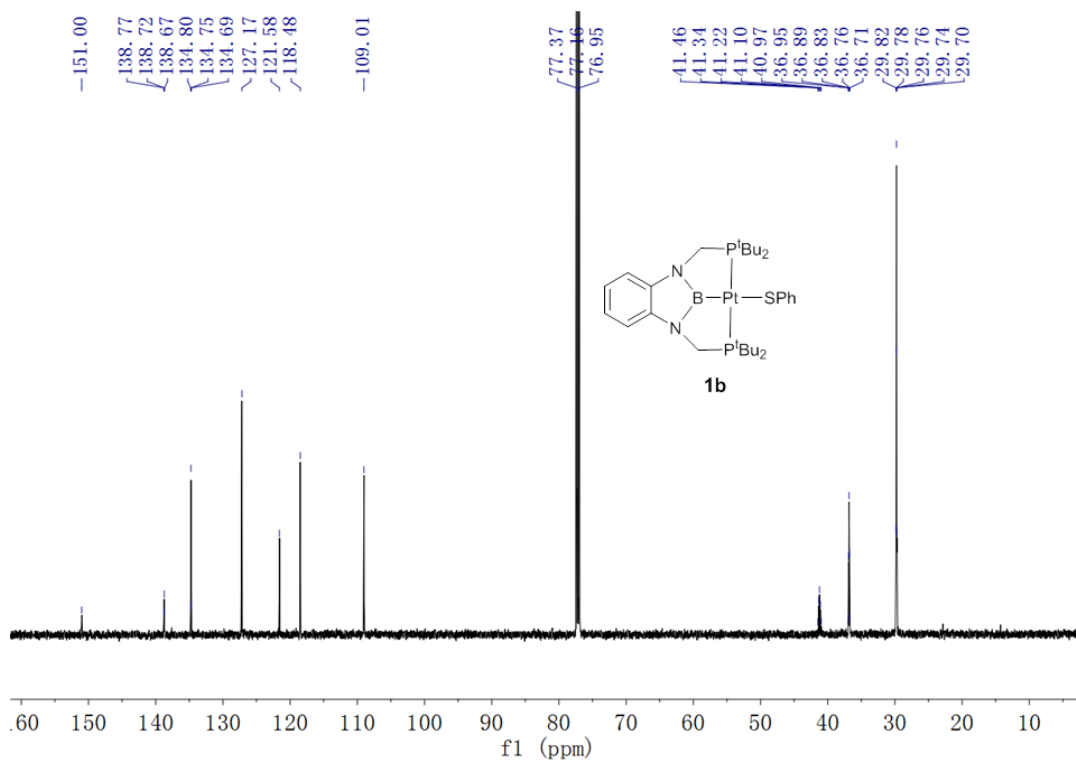

**Fig. S6**  $^{13}\text{C}\{^1\text{H}\}$  NMR spectrum of complex **1b** (151 MHz,  $\text{CDCl}_3$ )

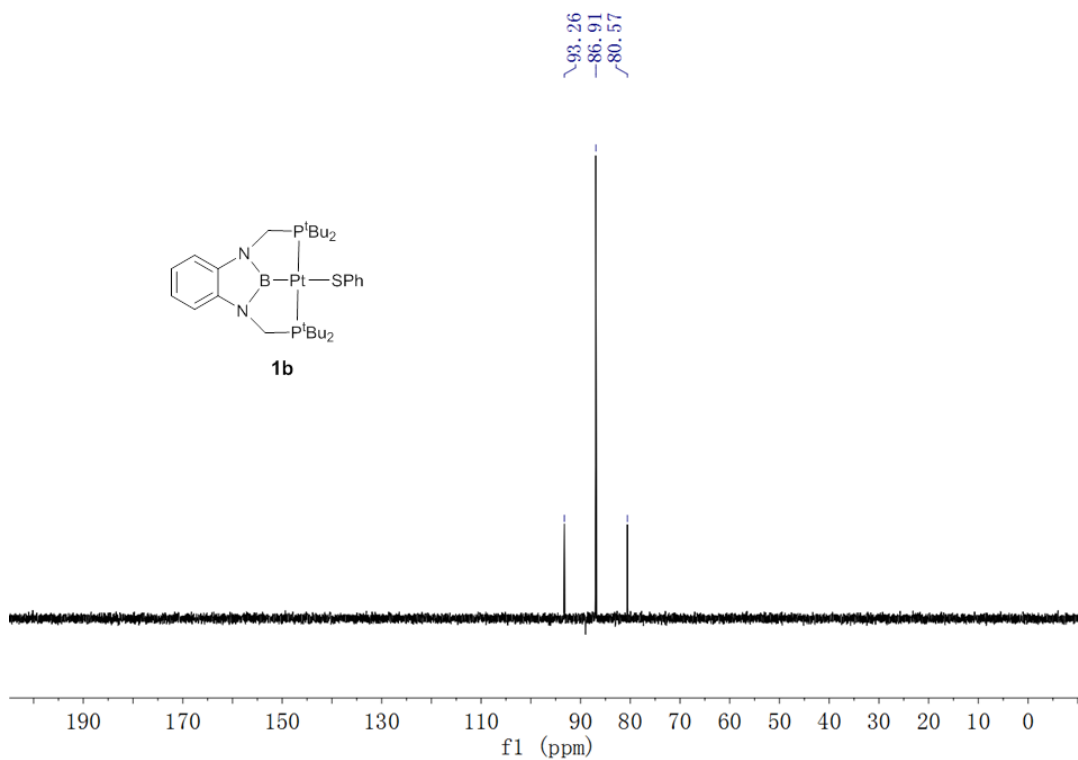

**Fig. S7** <sup>31</sup>P{<sup>1</sup>H} NMR spectrum of complex **1b** (243 MHz, CDCl<sub>3</sub>)

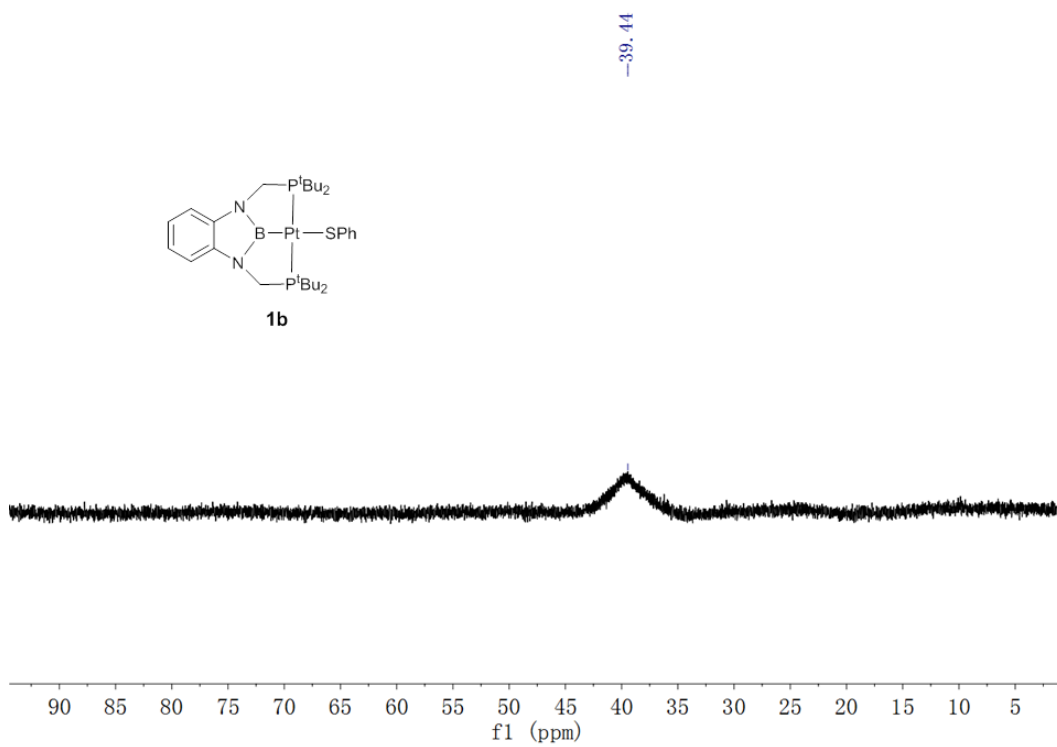

**Fig. S8** <sup>11</sup>B NMR spectrum of complex **1b** (193 MHz, CDCl<sub>3</sub>)

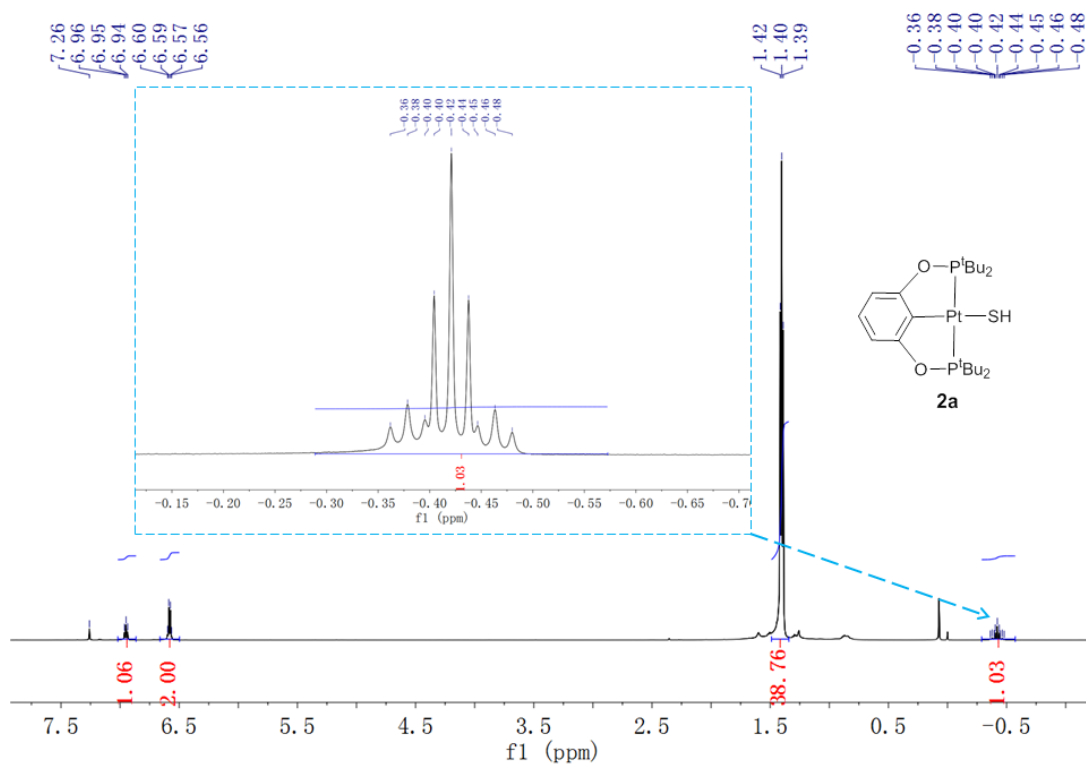

**Fig. S9**  $^1\text{H}$  NMR spectrum of complex **2a** (600 MHz,  $\text{CDCl}_3$ )

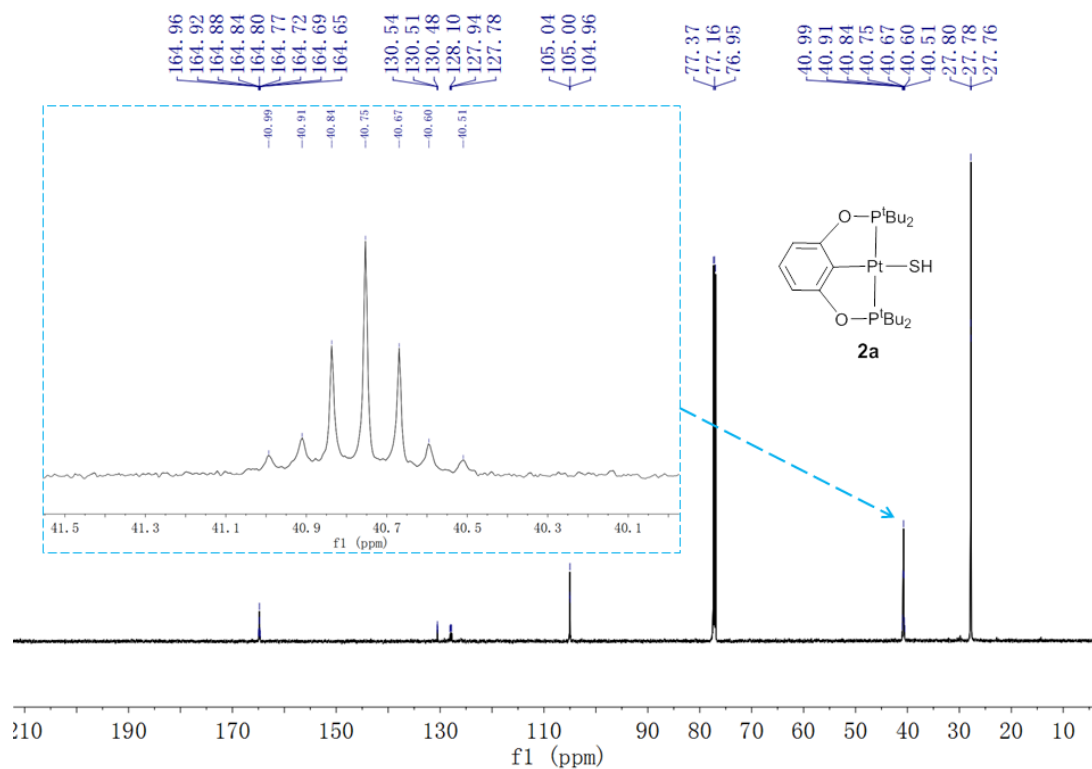

**Fig. S10**  $^{13}\text{C}\{^1\text{H}\}$  NMR spectrum of complex **2a** (151 MHz,  $\text{CDCl}_3$ )

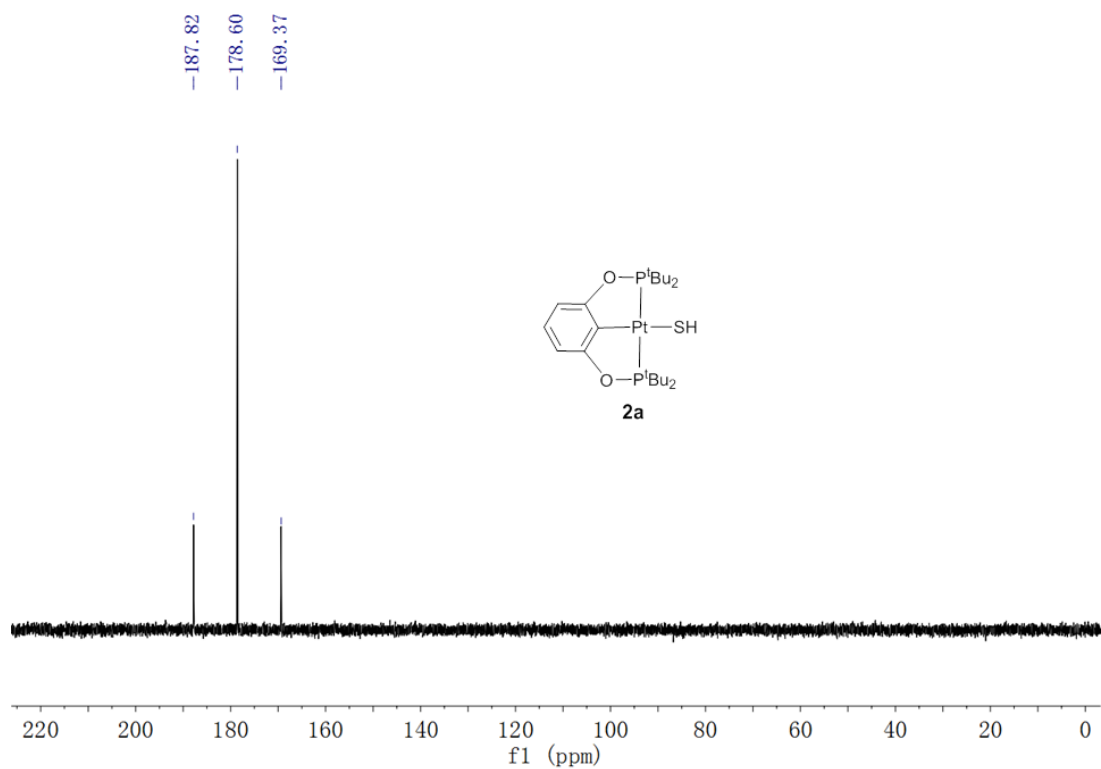

**Fig. S11**  $^{31}\text{P}\{^1\text{H}\}$  NMR spectrum of complex **2a** (162 MHz,  $\text{C}_6\text{D}_6$ )

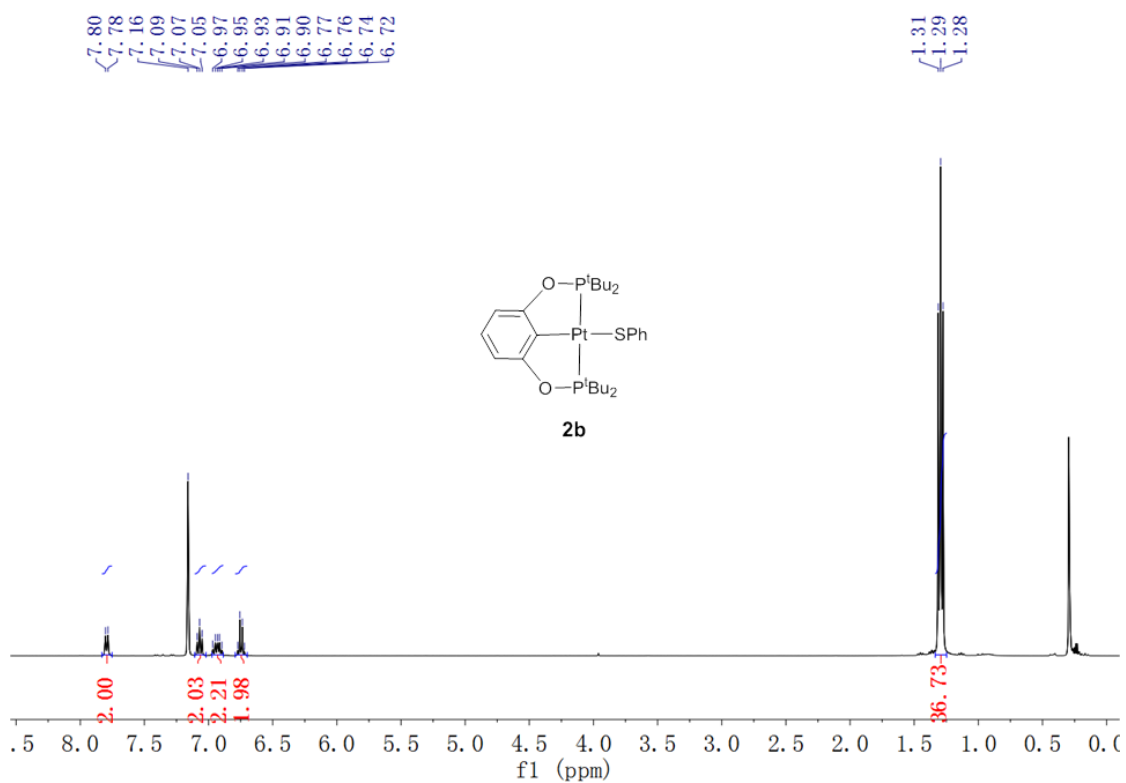

**Fig. S12**  $^1\text{H}$  NMR spectrum of complex **2b** (400 MHz,  $\text{C}_6\text{D}_6$ )

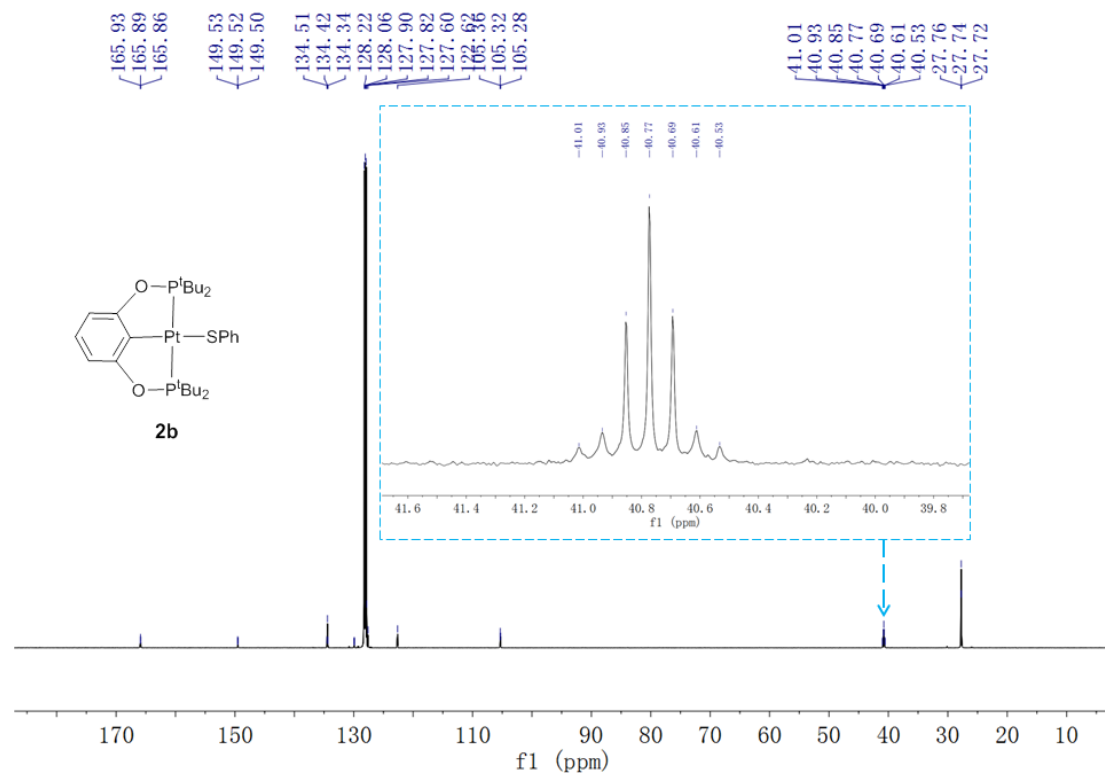

**Fig. S13**  $^{13}\text{C}\{^1\text{H}\}$  NMR spectrum of complex **2b** (151 MHz,  $\text{C}_6\text{D}_6$ )

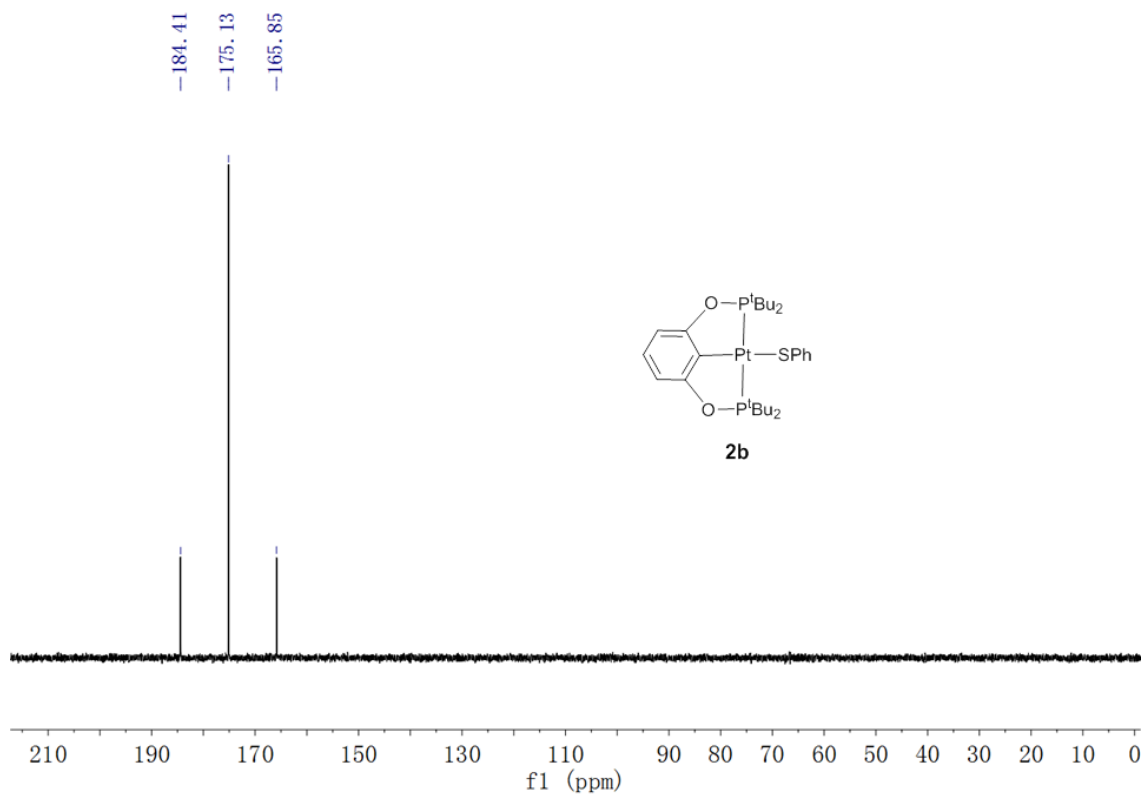

**Fig. S14**  $^{31}\text{P}\{^1\text{H}\}$  NMR spectrum of complex **2b** (162 MHz,  $\text{C}_6\text{D}_6$ )



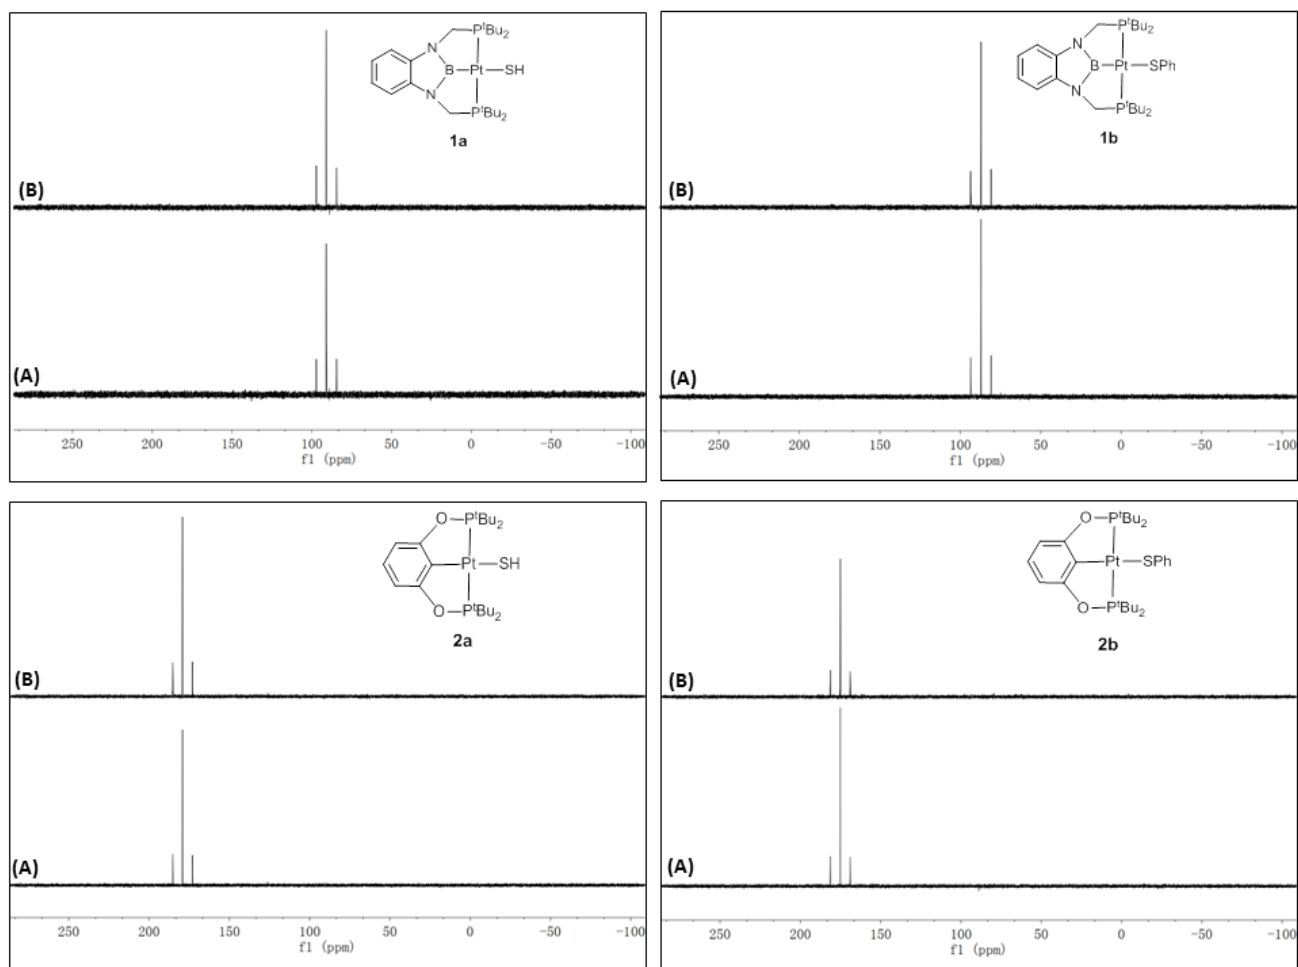

**Fig. S15**  $^{31}\text{P}\{^1\text{H}\}$  NMR spectra of complexes **1a,b** and **2a,b** recorded at room temperature under an air atmosphere (162 MHz,  $\text{C}_6\text{D}_6$ ). (A) spectra recorded immediately after making the solutions under an air atmosphere; (B) spectra recorded after the NMR tubes were exposed in air for 6 h.

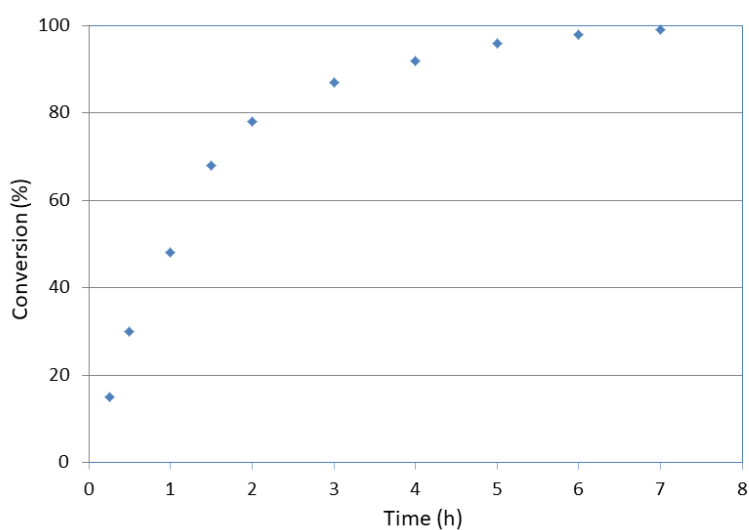

**Fig. S16** The profile of conversion vs time for hydrosilylation of benzaldehyde with  $\text{PhSiH}_3$  catalysed by **1a** at 25 °C (see Table 2 entry 9 in the main text for detailed reaction conditions).

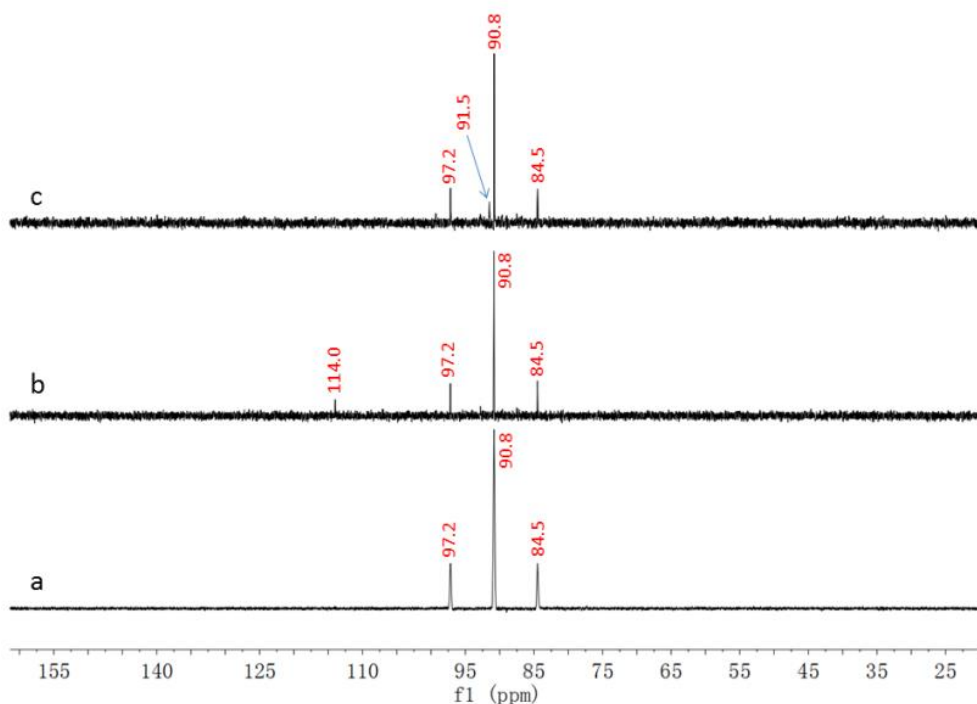

**Fig. S17**  $^{31}\text{P}\{^1\text{H}\}$  NMR spectra of the reaction mixture of **1a** (0.1 mmol), PhCHO (0.1 mmol) and PhSiH<sub>3</sub> (0.1 mmol) in C<sub>6</sub>D<sub>6</sub> at room temperature. (a) **1a** in C<sub>6</sub>D<sub>6</sub> before adding PhCHO and PhSiH<sub>3</sub>; (b) spectrum recorded 5 h after adding PhCHO and PhSiH<sub>3</sub>; (c) spectrum recorded 23 h after adding PhCHO and PhSiH<sub>3</sub>.

**Table S1.** The highest turnover frequency values (TOF/h<sup>-1</sup>) of the reported platinum catalyst systems for the hydrosilylation of carbonyl compounds

| Entry          | Catalyst                                                                                                                                  | Temp. (°C) | TOF for aldehyde | TOF for ketone | Ref       |
|----------------|-------------------------------------------------------------------------------------------------------------------------------------------|------------|------------------|----------------|-----------|
| 1 <sup>a</sup> | [Pt(PPh <sub>3</sub> ) <sub>3</sub> ]                                                                                                     | 45         | 0.1              |                | S1        |
| 2 <sup>a</sup> | [[Pt(PMe <sub>3</sub> ) <sub>3</sub> ](μ-SiPh <sub>2</sub> ) <sub>3</sub> ]                                                               | 25         | 0.7              |                | S1,S2     |
| 3 <sup>a</sup> | [Pt(C <sub>2</sub> H <sub>4</sub> )(PPh <sub>3</sub> ) <sub>2</sub> ]                                                                     | 80         | 9                |                | S3        |
| 4 <sup>a</sup> | [PtCl <sub>2</sub> {(S,R)Fe(C <sub>5</sub> H <sub>5</sub> )(C <sub>5</sub> H <sub>3</sub> (CHMeNMe <sub>2</sub> )PPh <sub>2</sub> -1,2)}] | 20         |                  | 2              | S4        |
| 5              | [PtH( <sup>t</sup> Bu <sub>2</sub> PO) <sub>2</sub> -1,3-C <sub>6</sub> H <sub>3</sub> ]                                                  | 60         | 3,200            | 200            | S5        |
| 6              | [Pt(SH){B(NCH <sub>2</sub> P <sup>t</sup> Bu <sub>2</sub> ) <sub>2</sub> -1,2-C <sub>6</sub> H <sub>4</sub> }]                            | 65         | 67,000           | 3,300          | This work |

<sup>a</sup> The TOF values were calculated based on the experimental data reported in the literature

**Table S2.** Summary of crystal data and structure refinement for complexes **1a** and **1b**

| Complex                                                                              | <b>1a</b>                                                          | <b>1b</b>                                                          |
|--------------------------------------------------------------------------------------|--------------------------------------------------------------------|--------------------------------------------------------------------|
| CCDC number                                                                          | 2124656                                                            | 2124657                                                            |
| Empirical formula                                                                    | C <sub>24</sub> H <sub>45</sub> BN <sub>2</sub> P <sub>2</sub> PtS | C <sub>30</sub> H <sub>45</sub> BN <sub>2</sub> P <sub>2</sub> PtS |
| Formula weight                                                                       | 661.52                                                             | 733.58                                                             |
| Temp, K                                                                              | 150.0(3)                                                           | 293(2)                                                             |
| Crystal system                                                                       | orthorhombic                                                       | Monoclinic                                                         |
| Space group                                                                          | Pbca                                                               | P2 <sub>1</sub> /n                                                 |
| <i>a</i> , Å                                                                         | 12.01270(10)                                                       | 12.87340(10)                                                       |
| <i>b</i> , Å                                                                         | 14.4319(2)                                                         | 17.4918(2)                                                         |
| <i>c</i> , Å                                                                         | 32.1440(5)                                                         | 14.8878(2)                                                         |
| $\alpha$ (°)                                                                         | 90                                                                 | 90                                                                 |
| $\beta$ (°)                                                                          | 90                                                                 | 103.5780(10)                                                       |
| $\gamma$ (°)                                                                         | 90                                                                 | 90                                                                 |
| Volume, Å <sup>3</sup>                                                               | 5572.68(13)                                                        | 3258.72(6)                                                         |
| <i>Z</i>                                                                             | 8                                                                  | 4                                                                  |
| <i>d</i> <sub>calc</sub> , g cm <sup>-3</sup>                                        | 1.577                                                              | 1.495                                                              |
| $\lambda$ , Å                                                                        | 1.54184                                                            | 1.54184                                                            |
| $\mu$ , mm <sup>-1</sup>                                                             | 11.299                                                             | 9.727                                                              |
| No. of data collected                                                                | 15153                                                              | 13424                                                              |
| No. of unique data                                                                   | 5223                                                               | 6216                                                               |
| <i>R</i> <sub>int</sub>                                                              | 0.0413                                                             | 0.0423                                                             |
| Goodness-of-fit on <i>F</i> <sup>2</sup>                                             | 1.088                                                              | 1.158                                                              |
| <i>R</i> <sub>1</sub> , <i>wR</i> <sub>2</sub> ( <i>I</i> > 2 $\sigma$ ( <i>I</i> )) | 0.0416, 0.1080                                                     | 0.0567, 0.1682                                                     |
| <i>R</i> <sub>1</sub> , <i>wR</i> <sub>2</sub> (all data)                            | 0.0597, 0.1174                                                     | 0.0632, 0.1732                                                     |

**Table S3.** Summary of crystal data and structure refinement for complexes **2a** and **2b**

| Complex                                                                      | <b>2a</b>                                                         | <b>2b</b>                                                         |
|------------------------------------------------------------------------------|-------------------------------------------------------------------|-------------------------------------------------------------------|
| CCDC number                                                                  | 2124658                                                           | 2124659                                                           |
| Empirical formula                                                            | C <sub>22</sub> H <sub>40</sub> O <sub>2</sub> P <sub>2</sub> PtS | C <sub>28</sub> H <sub>44</sub> O <sub>2</sub> P <sub>2</sub> PtS |
| Formula weight                                                               | 625.63                                                            | 701.72                                                            |
| Temp, K                                                                      | 169.99(10)                                                        | 169.99(10)                                                        |
| Crystal system                                                               | triclinic                                                         | monoclinic                                                        |
| Space group                                                                  | P-1                                                               | P2 <sub>1</sub> /n                                                |
| <i>a</i> , Å                                                                 | 8.3204(3)                                                         | 12.79010(10)                                                      |
| <i>b</i> , Å                                                                 | 12.0711(4)                                                        | 12.6583(2)                                                        |
| <i>c</i> , Å                                                                 | 13.4168(4)                                                        | 20.8480(2)                                                        |
| <i>α</i> (°)                                                                 | 100.588(3)                                                        | 90                                                                |
| <i>β</i> (°)                                                                 | 95.692(3)                                                         | 106.5180(10)                                                      |
| <i>γ</i> (°)                                                                 | 104.316(3)                                                        | 90                                                                |
| Volume, Å <sup>3</sup>                                                       | 1268.58(8)                                                        | 3236.01(7)                                                        |
| <i>Z</i>                                                                     | 2                                                                 | 4                                                                 |
| <i>d</i> <sub>calc</sub> , g cm <sup>-3</sup>                                | 1.638                                                             | 1.440                                                             |
| <i>λ</i> , Å                                                                 | 1.54184                                                           | 1.54184                                                           |
| <i>μ</i> , mm <sup>-1</sup>                                                  | 12.414                                                            | 9.800                                                             |
| No. of data collected                                                        | 8829                                                              | 15296                                                             |
| No. of unique data                                                           | 4809                                                              | 6160                                                              |
| <i>R</i> <sub>int</sub>                                                      | 0.0220                                                            | 0.0338                                                            |
| Goodness-of-fit on <i>F</i> <sup>2</sup>                                     | 1.049                                                             | 1.074                                                             |
| <i>R</i> <sub>1</sub> , w <i>R</i> <sub>2</sub> ( <i>I</i> > 2σ( <i>I</i> )) | 0.0204, 0.0484                                                    | 0.0327, 0.0887                                                    |
| <i>R</i> <sub>1</sub> , w <i>R</i> <sub>2</sub> (all data)                   | 0.0224, 0.0491                                                    | 0.0354, 0.0902                                                    |

## Characterization of the isolated products

### Benzyl alcohol

Clear colorless liquid, 0.102 g, 95% yield, purity: >99% based on  $^1\text{H}$  NMR spectrum.  $^1\text{H}$  NMR (600 MHz,  $\text{CDCl}_3$ ,  $\delta$ ): 7.31–7.39 (m, ArH, 5H), 4.60 (s,  $\text{CH}_2$ , 2H), 3.33 (s, OH, 1H).  $^{13}\text{C}\{^1\text{H}\}$  NMR (151 MHz,  $\text{CDCl}_3$ ,  $\delta$ ): 140.89, 128.44, 127.46, 126.98, 64.84. HRMS (ESI):  $m/z$  calculated for  $\text{C}_7\text{H}_9\text{O}$  [ $\text{M} + \text{H}$ ] $^+$  109.0648, found 109.0647. These spectral data correspond to previously reported data.<sup>S6-S8</sup>

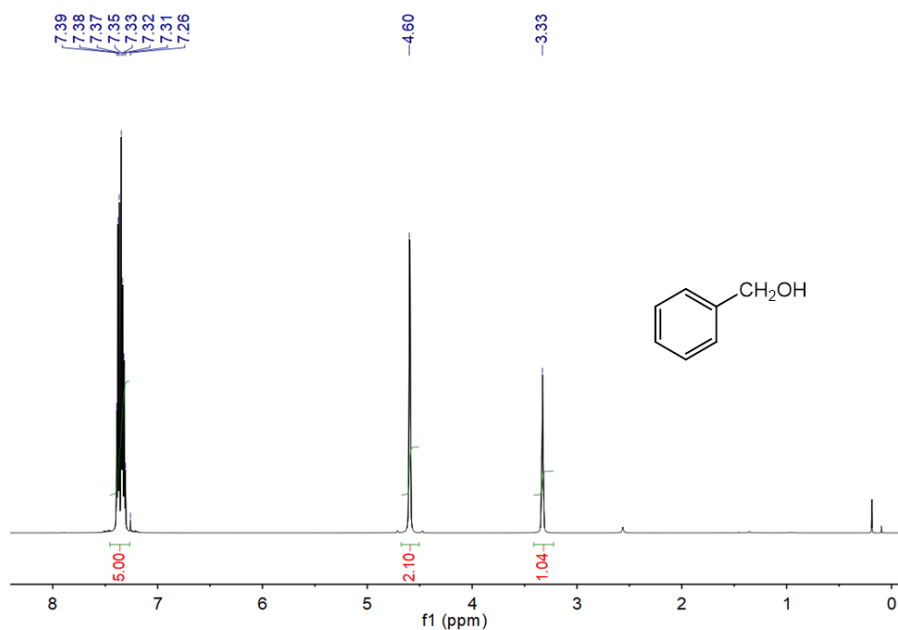

**Fig. S18**  $^1\text{H}$  NMR spectrum of the isolated benzyl alcohol (600 MHz,  $\text{CDCl}_3$ )

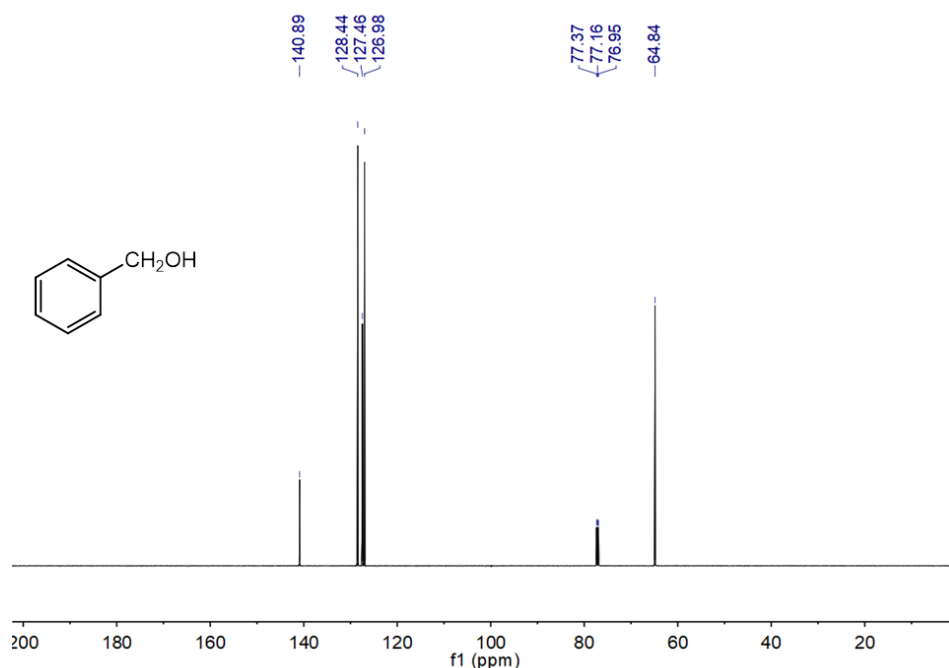

**Fig. S19**  $^{13}\text{C}\{^1\text{H}\}$  NMR spectrum of the isolated benzyl alcohol (151 MHz,  $\text{CDCl}_3$ )

### 4-Methoxyphenylmethanol

Light yellow liquid, 0.134 g, 97% yield, purity: >99% based on  $^1\text{H}$  NMR spectrum.  $^1\text{H}$  NMR (600 MHz,  $\text{CDCl}_3$ ,  $\delta$ ): 7.27 (d,  $J = 8.6$  Hz, ArH, 2H), 6.89 (d,  $J = 8.6$  Hz, ArH, 2H), 4.56 (s,  $\text{CH}_2$ , 2H), 3.80 (s,  $\text{CH}_3$ , 3H), 2.53 (s, br., OH, 1H).  $^{13}\text{C}\{^1\text{H}\}$  NMR (151 MHz,  $\text{CDCl}_3$ ,  $\delta$ ): 159.12, 133.22, 128.66, 113.93, 64.80, 55.30. HRMS (ESI):  $m/z$  calculated for  $\text{C}_8\text{H}_{11}\text{O}_2$   $[\text{M} + \text{H}]^+$  139.0754, found 139.0756. These spectral data correspond to previously reported data.<sup>S6-S9</sup>

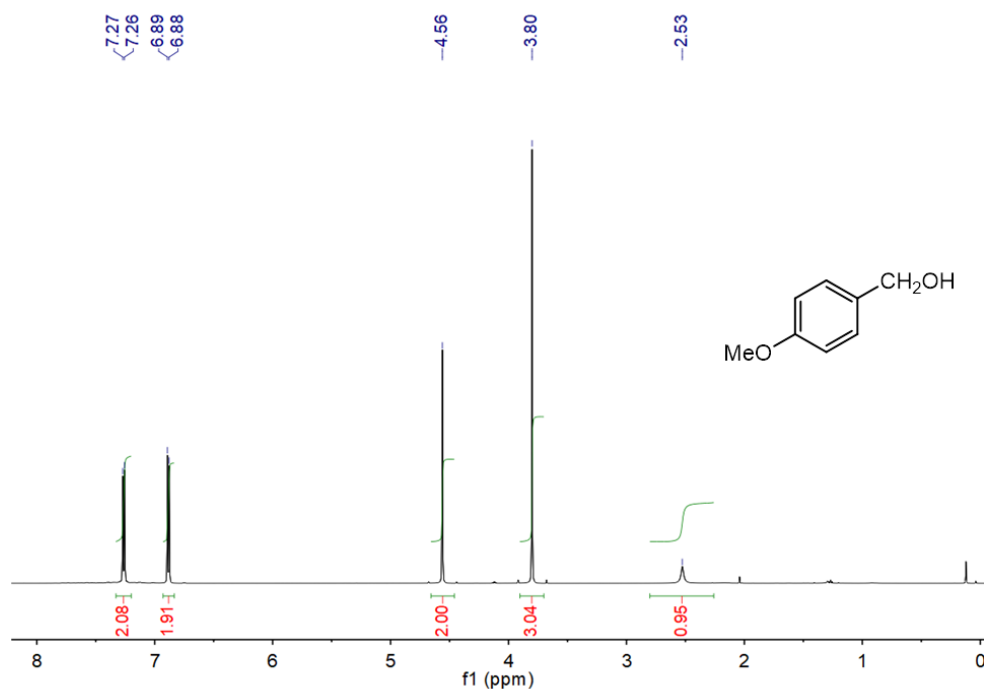

**Fig. S20**  $^1\text{H}$  NMR spectrum of the isolated 4-methoxyphenylmethanol (600 MHz,  $\text{CDCl}_3$ )

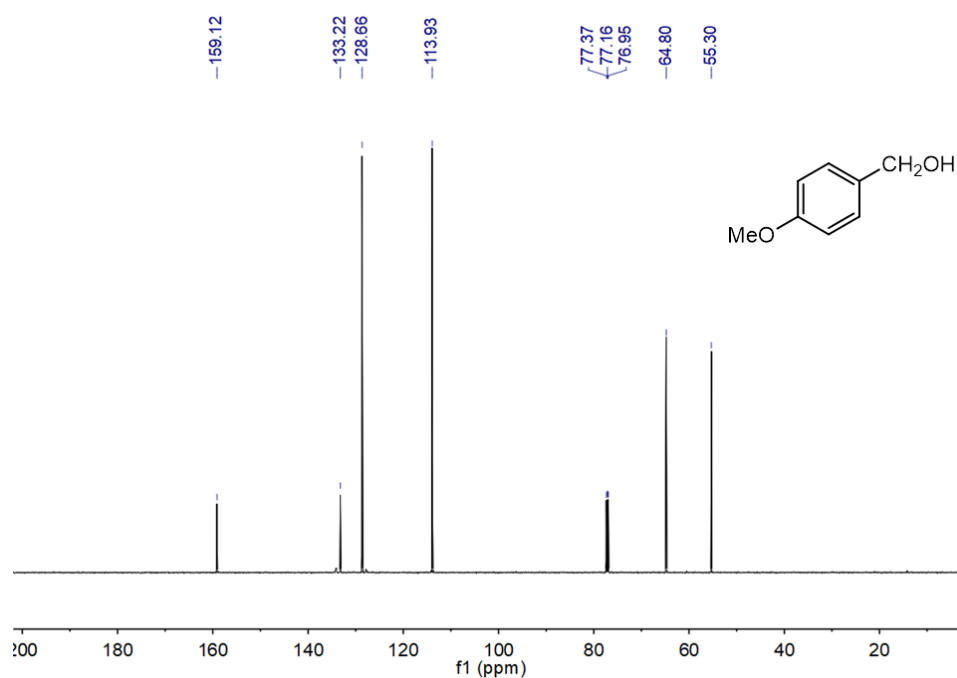

**Fig. S21**  $^{13}\text{C}\{^1\text{H}\}$  NMR spectrum of the isolated 4-methoxyphenylmethanol (151 MHz,  $\text{CDCl}_3$ )

### 3-Methoxyphenylmethanol

Clear colorless liquid, 0.133 g, 96% yield, purity: >99% based on  $^1\text{H}$  NMR spectra.  $^1\text{H}$  NMR (600 MHz,  $\text{CDCl}_3$ ,  $\delta$ ): 7.17 (t,  $J_{\text{H-H}} = 7.8\text{Hz}$ , ArH, 1H), 6.81–6.83 (m, ArH, 2H), 6.73–6.75 (m, ArH, 1H), 4.51 (s,  $\text{CH}_2$ , 2H), 3.70 (s,  $\text{CH}_3$ , 3H), 2.72 (br., OH, 1H).  $^{13}\text{C}\{^1\text{H}\}$  NMR (151 MHz,  $\text{CDCl}_3$ ,  $\delta$ ): 159.77, 142.64, 129.55, 119.16, 113.18, 112.27, 64.98, 55.21. HRMS (ESI):  $m/z$  calculated for  $\text{C}_8\text{H}_{11}\text{O}_2$   $[\text{M} + \text{H}]^+$  139.0754, found 139.0753. These spectral data correspond to previously reported data.<sup>S10</sup>

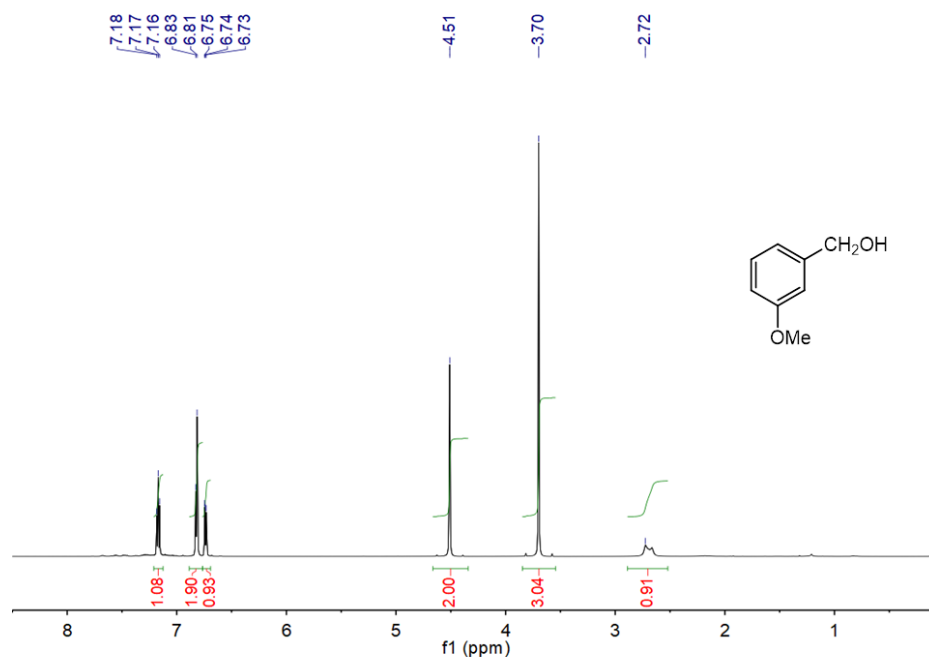

**Fig. S22**  $^1\text{H}$  NMR spectrum of the isolated 3-methoxyphenylmethanol (600 MHz,  $\text{CDCl}_3$ )

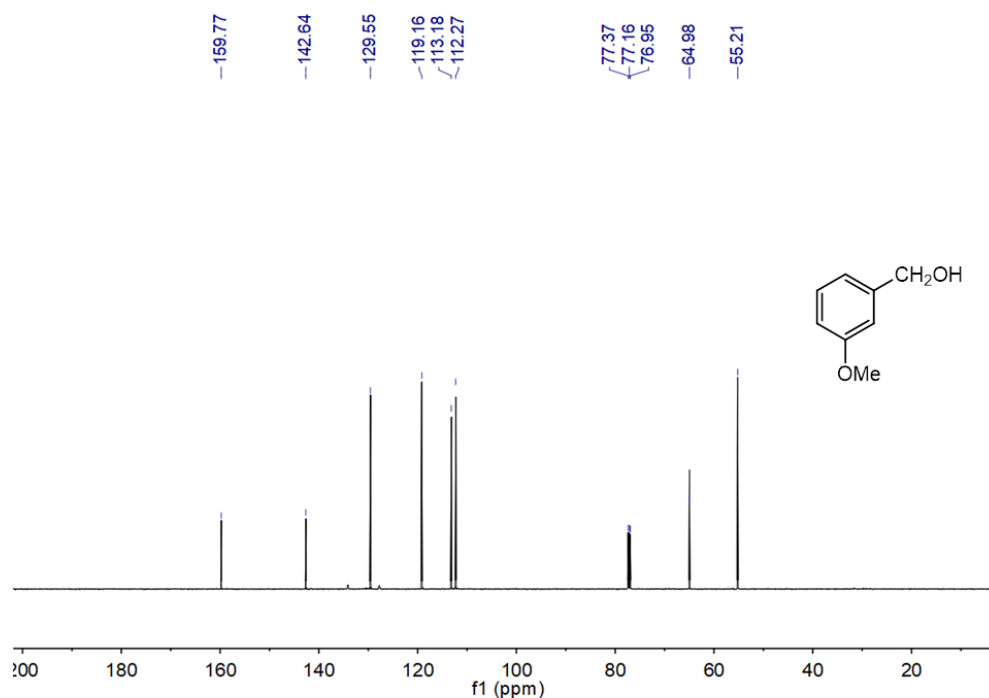

**Fig. S23**  $^{13}\text{C}\{^1\text{H}\}$  NMR spectrum of the isolated 3-methoxyphenylmethanol (151 MHz,  $\text{CDCl}_3$ )

### 2-Methoxyphenylmethanol

Colorless liquid, 0.126 g, 91% yield, purity: >99% based on  $^1\text{H}$  NMR spectrum.  $^1\text{H}$  NMR (600 MHz,  $\text{CDCl}_3$ ,  $\delta$ ): 7.27–7.30 (m, ArH, 2H), 6.94–6.97 (m, ArH, 1H), 6.88–6.90 (m, ArH, 1H), 4.69 (s,  $\text{CH}_2$ , 2H), 3.86 (s,  $\text{CH}_3$ , 3H), 2.52 (s, br, OH, 1H).  $^{13}\text{C}\{^1\text{H}\}$  NMR (151 MHz,  $\text{CDCl}_3$ ,  $\delta$ ): 157.43, 129.13, 128.93, 128.71, 120.67, 110.22, 61.95, 55.27. HRMS (ESI):  $m/z$  calculated for  $\text{C}_8\text{H}_{11}\text{O}_2$   $[\text{M} + \text{H}]^+$  139.0754, found 139.0755. These spectral data correspond to previously reported data.<sup>S11</sup>

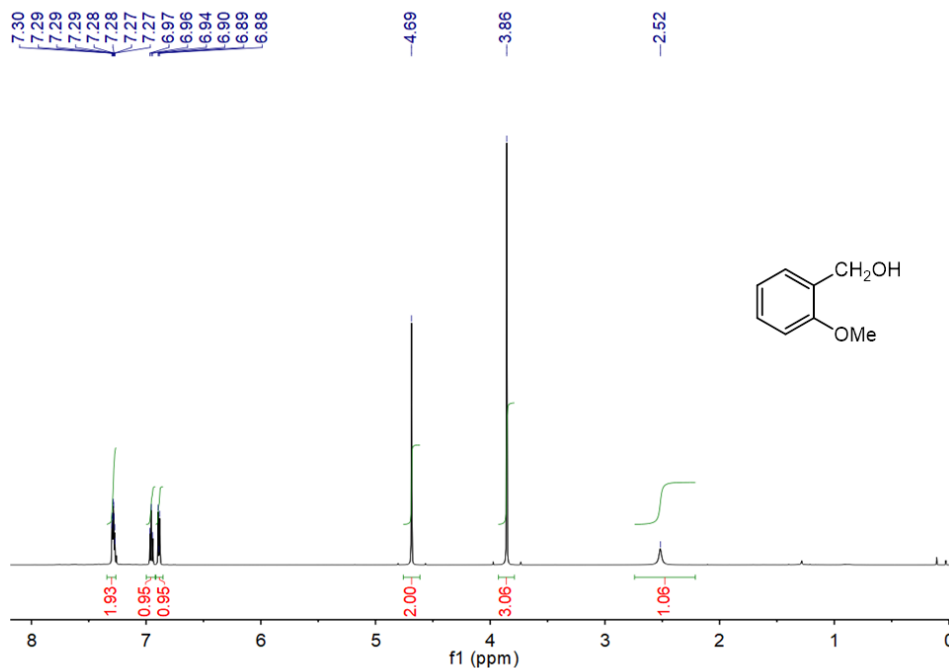

**Fig. S24**  $^1\text{H}$  NMR spectrum of the isolated 2-methoxyphenylmethanol (600 MHz,  $\text{CDCl}_3$ )

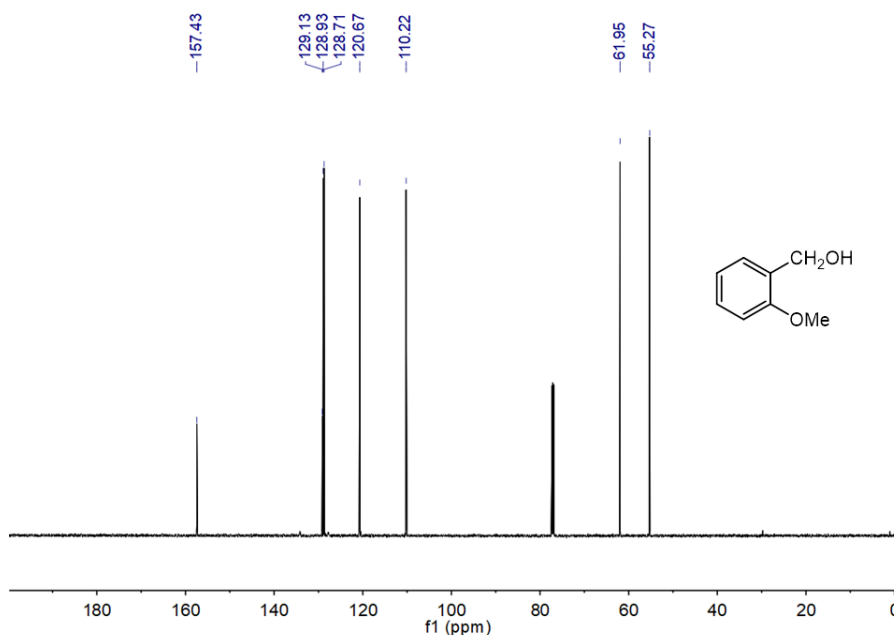

**Fig. S25**  $^{13}\text{C}\{^1\text{H}\}$  NMR spectrum of the isolated 2-methoxyphenylmethanol (151 MHz,  $\text{CDCl}_3$ )



### 4-Tolyl-methanol

Colorless crystalline solid, 0.112 g, 92% yield, purity: >99% based on  $^1\text{H}$  NMR spectrum.  $^1\text{H}$  NMR (600 MHz,  $\text{CDCl}_3$ ,  $\delta$ ): 7.07 (d,  $J_{\text{H-H}} = 8.0$  Hz, ArH, 2H), 6.99 (d,  $J_{\text{H-H}} = 8.0$  Hz, ArH, 2H), 4.46 (s,  $\text{CH}_2$ , 2H), 2.17 (s,  $\text{CH}_3$ , 3H), 1.44 (s, br., OH, 1H).  $^{13}\text{C}\{^1\text{H}\}$  NMR (151 MHz,  $\text{CDCl}_3$ ,  $\delta$ ): 138.05, 137.56, 129.39, 127.26, 65.43, 21.29. HRMS (ESI):  $m/z$  calculated for  $\text{C}_8\text{H}_{11}\text{O}$   $[\text{M} + \text{H}]^+$  123.0804, found 123.0808. These spectral data correspond to previously reported data.<sup>S7,S9</sup>

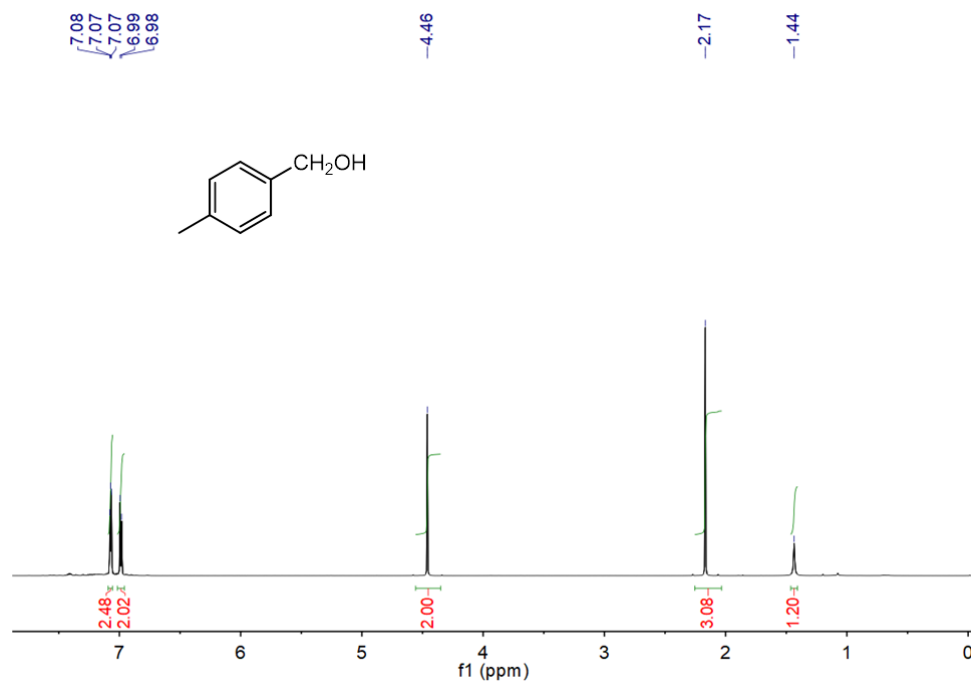

**Fig. S26**  $^1\text{H}$  NMR spectrum of the isolated 4-tolyl-methanol (600 MHz,  $\text{CDCl}_3$ )

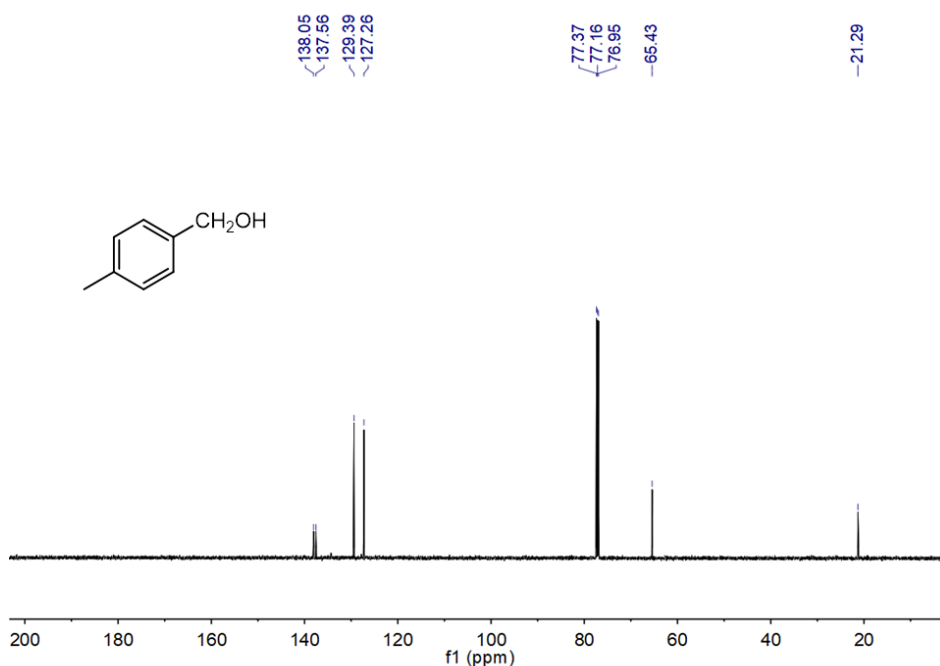

**Fig. S27**  $^{13}\text{C}\{^1\text{H}\}$  NMR spectrum of the isolated 4-tolyl-methanol (151 MHz,  $\text{CDCl}_3$ )

### 4-Nitrophenyl-methanol

Yellow crystalline solid, 0.145 g, 95% yield, purity: >99% based on  $^1\text{H}$  NMR spectrum.  $^1\text{H}$  NMR (600 MHz,  $\text{CDCl}_3$ ,  $\delta$ ): 8.21 (d,  $J_{\text{H-H}} = 8.7$  Hz, ArH, 2H), 7.53 (d,  $J_{\text{H-H}} = 8.7$  Hz, ArH, 2H), 4.83 (s,  $\text{CH}_2$ , 2H), 2.10 (s, br., OH, 1H).  $^{13}\text{C}\{^1\text{H}\}$  NMR (151 MHz,  $\text{CDCl}_3$ ,  $\delta$ ): 148.31, 147.42, 127.13, 123.86, 64.12. HRMS (ESI):  $m/z$  calculated for  $\text{C}_7\text{H}_8\text{NO}_3$   $[\text{M} + \text{H}]^+$  154.0499, found 154.0498. These spectral data correspond to previously reported data.<sup>S6</sup>

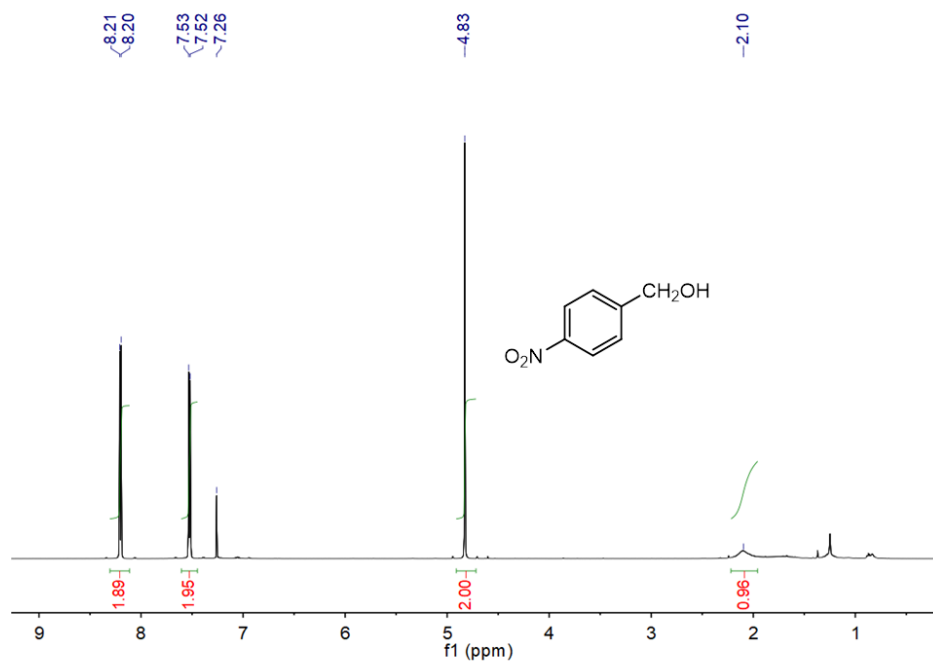

**Fig. S28**  $^1\text{H}$  NMR spectrum of the isolated 4-nitrophenyl-methanol (600 MHz,  $\text{CDCl}_3$ )

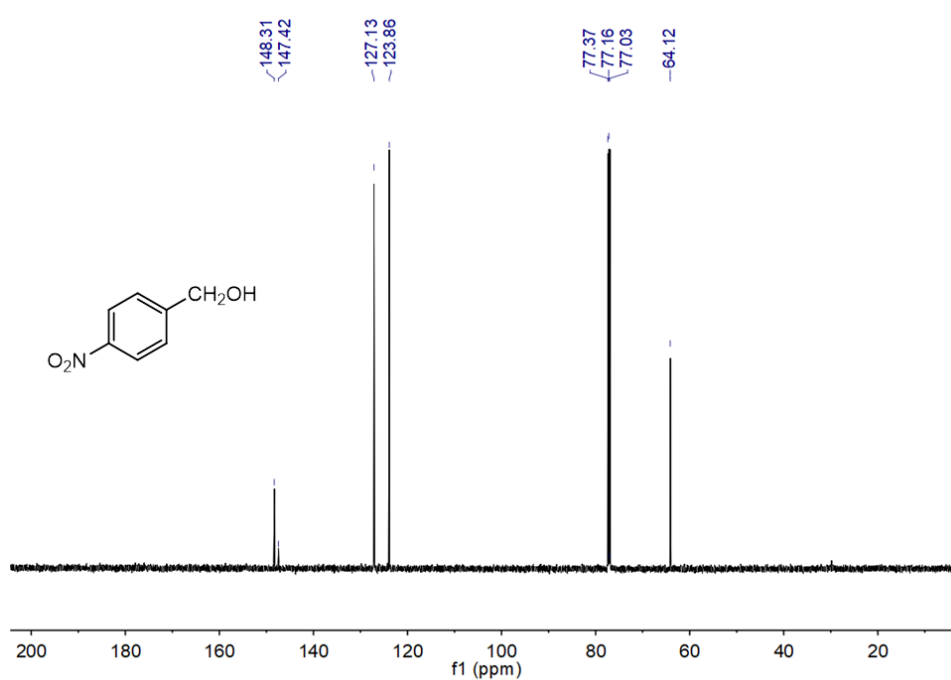

**Fig. S29**  $^{13}\text{C}\{^1\text{H}\}$  NMR spectrum of the isolated 4-nitrophenyl-methanol (151 MHz,  $\text{CDCl}_3$ )

### 4-Cyanobenzenemethanol

Colorless liquid, 0.109 g, 82% yield, purity: >98% based on  $^1\text{H}$  NMR spectrum.  $^1\text{H}$  NMR (600 MHz,  $\text{CDCl}_3$ ,  $\delta$ ): 7.47–7.49 (m, ArH, 2H), 7.34–7.35 (m, ArH, 2H), 4.61 (s,  $\text{CH}_2$ , 2H), 3.98 (br., OH, 1H).  $^{13}\text{C}\{^1\text{H}\}$  NMR (151 MHz,  $\text{CDCl}_3$ ,  $\delta$ ): 146.61, 132.26, 127.03, 118.94, 110.74, 63.92. HRMS (ESI):  $m/z$  calculated for  $\text{C}_8\text{H}_8\text{NO}$   $[\text{M} + \text{H}]^+$  134.0600, found 134.0601. These spectral data correspond to previously reported data.<sup>S8</sup>

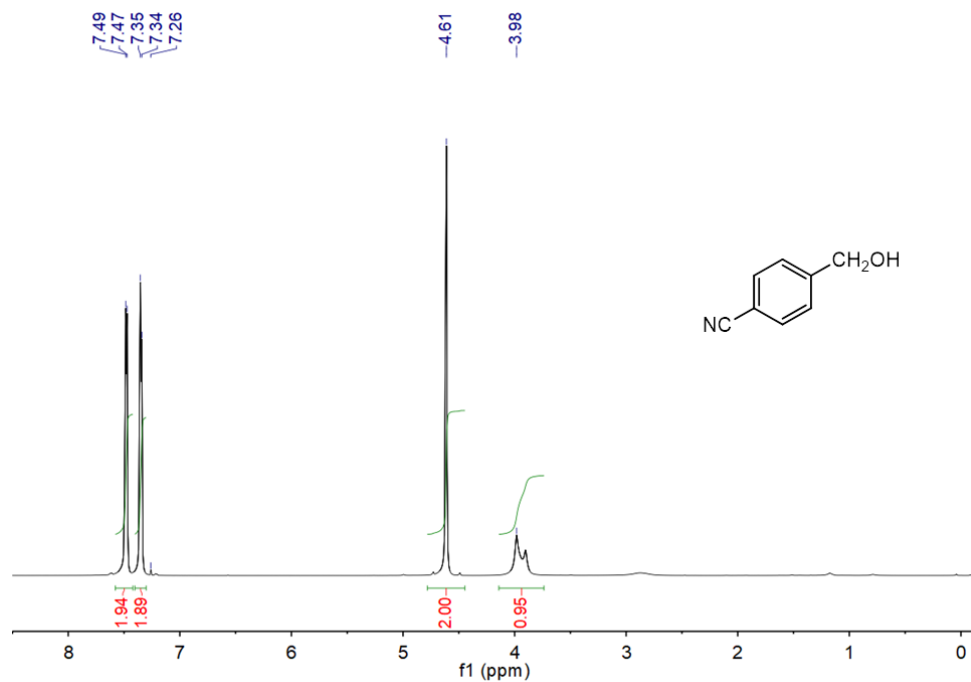

**Fig. S30**  $^1\text{H}$  NMR spectrum of the isolated 4-cyanobenzenemethanol (600 MHz,  $\text{CDCl}_3$ )

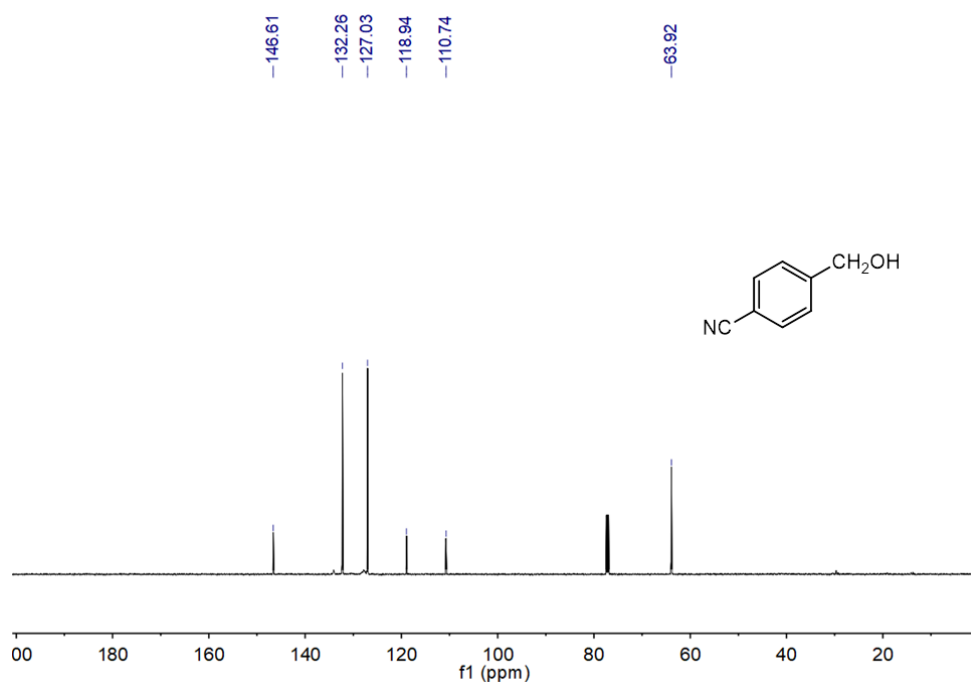

**Fig. S31**  $^{13}\text{C}\{^1\text{H}\}$  NMR spectrum of the isolated 4-cyanobenzenemethanol (151 MHz,  $\text{CDCl}_3$ )

### 4-Fluorophenyl-methanol

Clear colorless liquid, 0.115 g, 91% yield, purity: >97% based on  $^1\text{H}$  NMR spectrum.  $^1\text{H}$  NMR (600 MHz,  $\text{CDCl}_3$ ,  $\delta$ ): 7.30–7.33 (m, ArH, 2H), 7.02–7.05 (m, ArH, 2H), 4.63 (s,  $\text{CH}_2$ , 2H), 1.97 (s, br., OH, 1H).  $^{13}\text{C}\{^1\text{H}\}$  NMR (151 MHz,  $\text{CDCl}_3$ ,  $\delta$ ): 162.44 (d,  $^1J_{\text{C-F}} = 246$  Hz, ArC), 136.67 (s, ArC), 128.88 (d,  $^3J_{\text{C-F}} = 8$  Hz, ArC), 115.50 (d,  $^2J_{\text{C-F}} = 21$  Hz, ArC), 64.72 ( $\text{CH}_2$ ). HRMS (ESI):  $m/z$  calculated for  $\text{C}_7\text{H}_8\text{FO}$   $[\text{M} + \text{H}]^+$  127.0554, found 127.0551. These spectral data correspond to previously reported data.<sup>S7</sup>

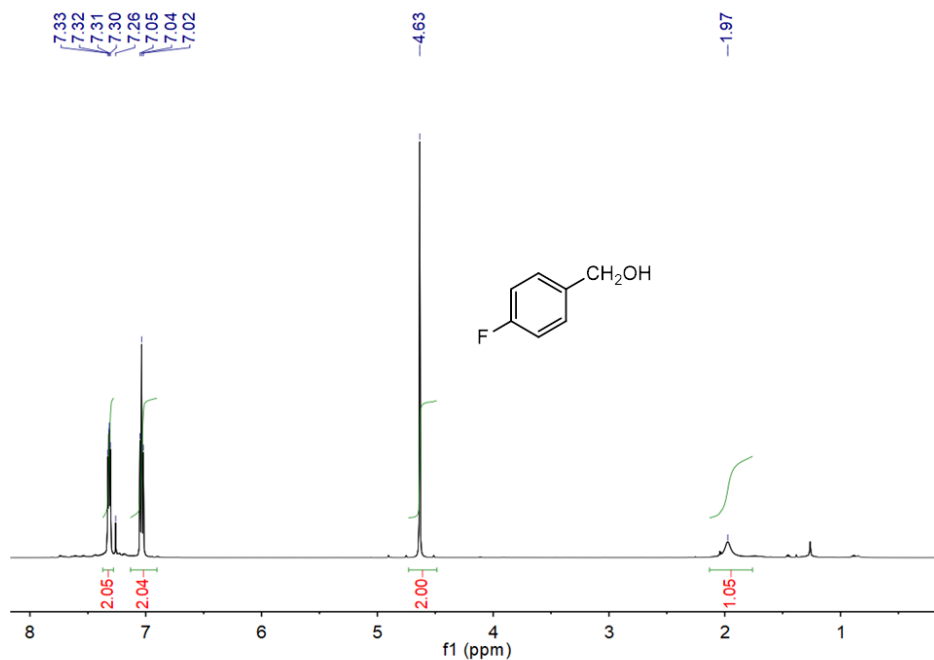

**Fig. S32**  $^1\text{H}$  NMR spectrum of the isolated 4-fluorophenyl-methanol (600 MHz,  $\text{CDCl}_3$ )

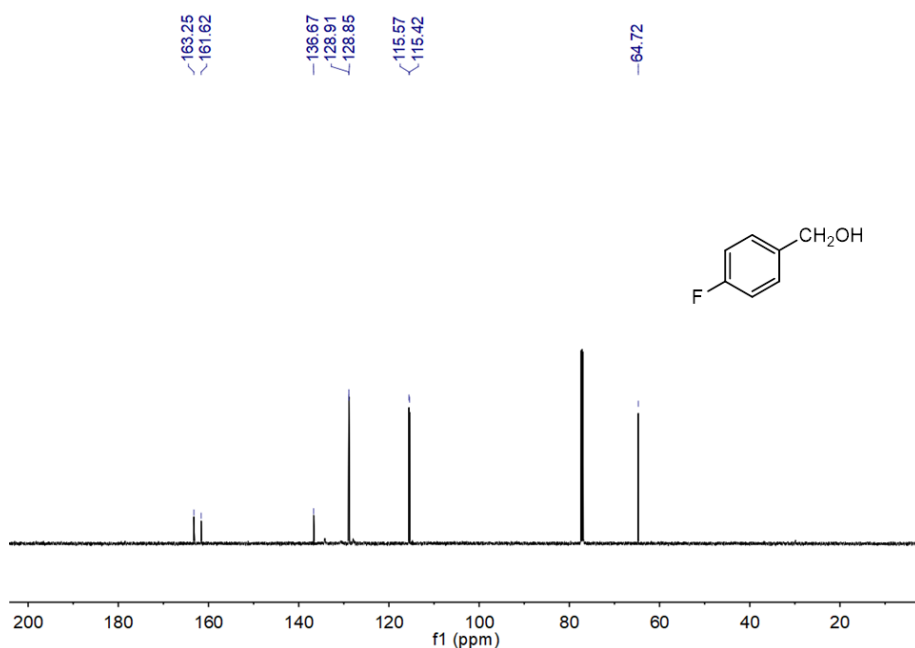

**Fig. S33**  $^{13}\text{C}\{^1\text{H}\}$  NMR spectrum of the isolated 4-fluorophenyl-methanol (151 MHz,  $\text{CDCl}_3$ )

### 4-Chlorophenyl-methanol

Colorless crystalline solid, 0.111 g, 78% yield, purity: >97% based on  $^1\text{H}$  NMR spectrum.  $^1\text{H}$  NMR (600 MHz,  $\text{CDCl}_3$ ,  $\delta$ ): 7.20 (d,  $J_{\text{H-H}} = 8.3$  Hz, ArH, 2H), 7.15 (d,  $J_{\text{H-H}} = 8.3$  Hz, ArH, 2H), 4.51 (s,  $\text{CH}_2$ , 2H), 1.95 (s, br., OH, 1H).  $^{13}\text{C}\{^1\text{H}\}$  NMR (151 MHz,  $\text{CDCl}_3$ ,  $\delta$ ): 139.35, 133.44, 128.77, 128.39, 64.60. HRMS (ESI):  $m/z$  calculated for  $\text{C}_7\text{H}_8\text{ClO}$   $[\text{M} + \text{H}]^+$  143.0258, found 143.0261. These spectral data correspond to previously reported data.<sup>S6,S10</sup>

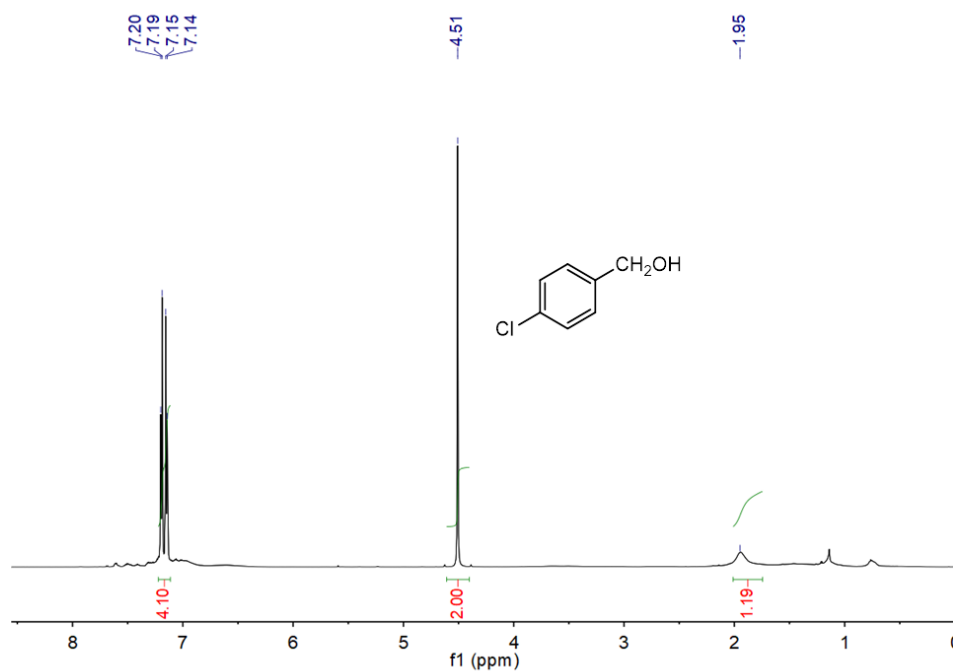

**Fig. S34**  $^1\text{H}$  NMR spectrum of the isolated 4-chlorophenyl-methanol (600 MHz,  $\text{CDCl}_3$ )

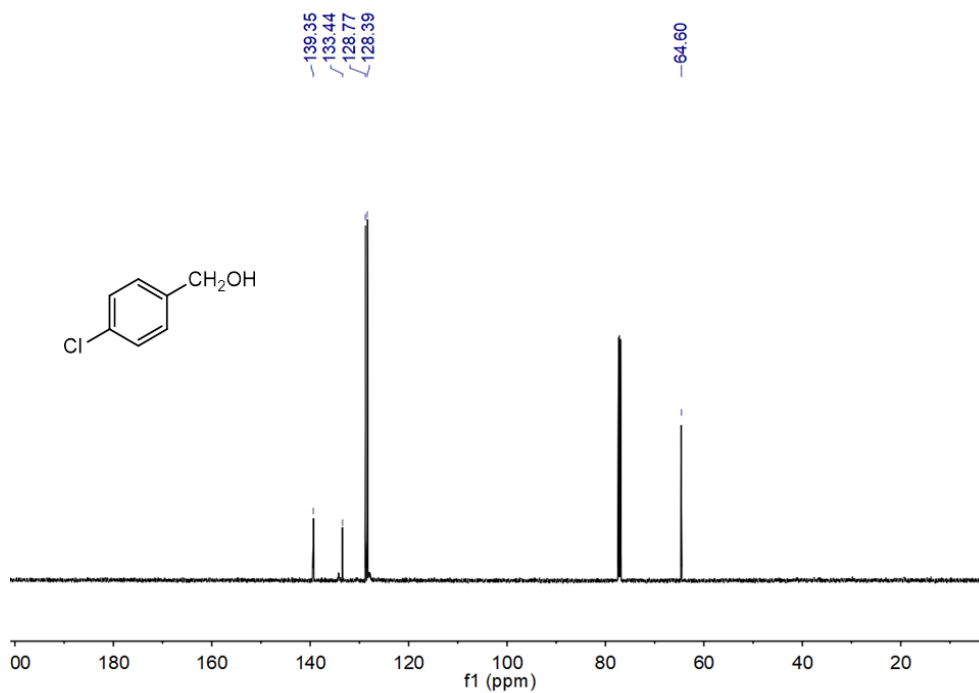

**Fig. S35**  $^{13}\text{C}\{^1\text{H}\}$  NMR spectrum of the isolated 4-chlorophenyl-methanol (151 MHz,  $\text{CDCl}_3$ )

### 4-Bromophenyl-methanol

Colorless crystalline solid, 0.155 g, 84% yield, purity: >97% based on  $^1\text{H}$  NMR spectra.  $^1\text{H}$  NMR (600 MHz,  $\text{CDCl}_3$ ,  $\delta$ ): 7.47 (d,  $J_{\text{H-H}} = 8.3$  Hz, ArH, 2H), 7.22 (d,  $J_{\text{H-H}} = 8.3$  Hz, ArH, 2H), 4.62 (s,  $\text{CH}_2$ , 2H), 2.02 (s, br., OH, 1H).  $^{13}\text{C}\{^1\text{H}\}$  NMR (151 MHz,  $\text{CDCl}_3$ ,  $\delta$ ): 139.86, 131.73, 128.70, 121.55, 64.63. HRMS (ESI):  $m/z$  calculated for  $\text{C}_7\text{H}_7\text{BrONa}$   $[\text{M} + \text{Na}]^+$  208.9572, found 208.9570. These spectral data correspond to previously reported data.<sup>S9</sup>

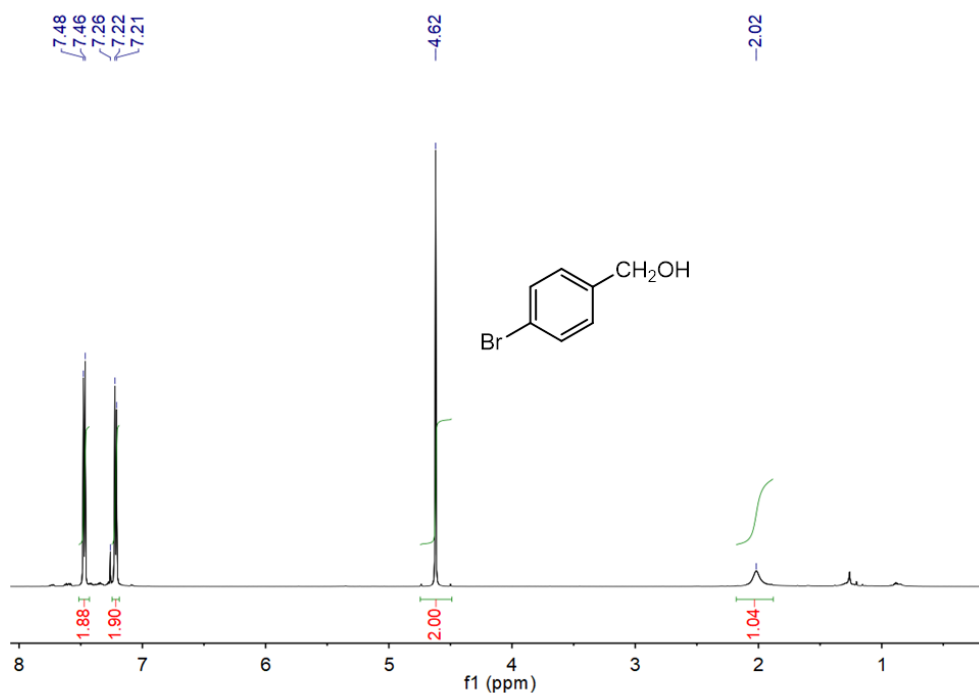

**Fig. S36**  $^1\text{H}$  NMR spectrum of the isolated 4-bromophenyl-methanol (600 MHz,  $\text{CDCl}_3$ )

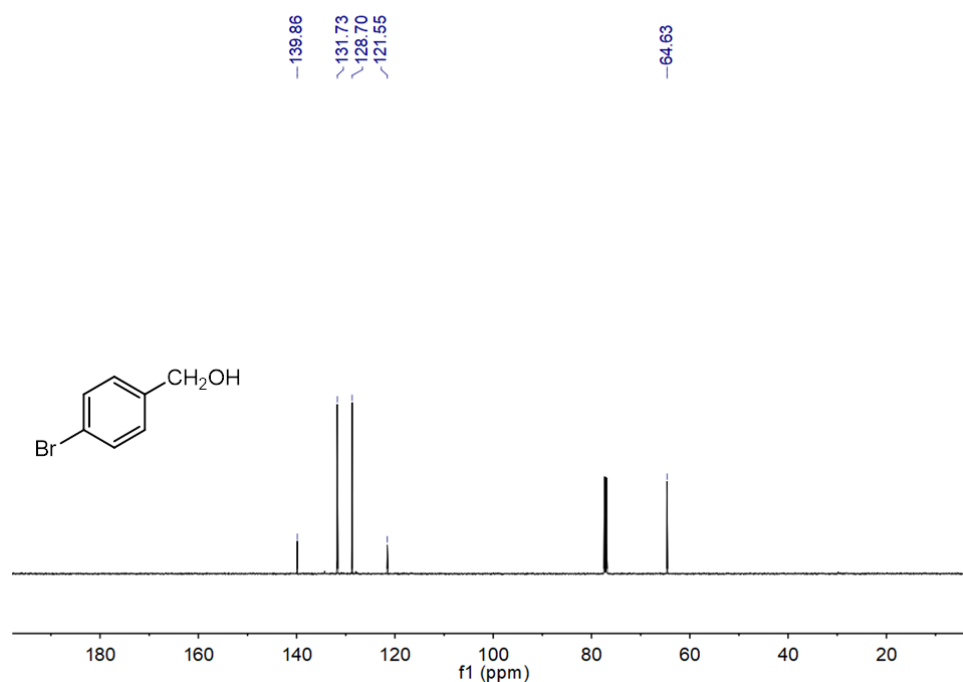

**Fig. S37**  $^{13}\text{C}\{^1\text{H}\}$  NMR spectrum of the isolated 4-bromophenyl-methanol (151 MHz,  $\text{CDCl}_3$ )

### 2-Naphthalenemethanol

Colorless crystalline solid, 0.119 g, 75% yield, purity: >99% based on  $^1\text{H}$  NMR spectrum.  $^1\text{H}$  NMR (600 MHz,  $\text{CDCl}_3$ ,  $\delta$ ): 7.81–7.85 (m, ArH, 4H), 7.47–7.51 (m, ArH, 3H), 4.86 (s,  $\text{CH}_2$ , 2H), 1.84 (s, OH, 1H).  $^{13}\text{C}\{^1\text{H}\}$  NMR (151 MHz,  $\text{CDCl}_3$ ,  $\delta$ ): 138.44, 133.51, 133.08, 128.48, 128.02, 127.85, 126.33, 126.04, 125.58, 125.30, 65.63. HRMS (ESI):  $m/z$  calculated for  $\text{C}_{11}\text{H}_{11}\text{O}$   $[\text{M} + \text{H}]^+$  159.0804, found 159.0805. These spectral data correspond to previously reported data.<sup>S6,S7,S12</sup>

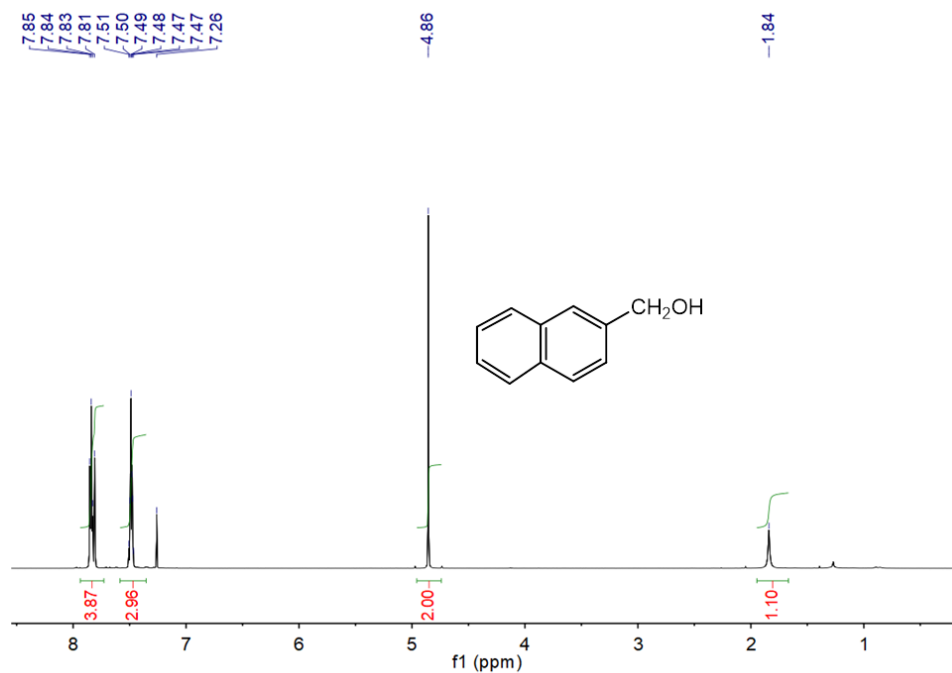

**Fig. S38**  $^1\text{H}$  NMR spectrum of the isolated 2-naphthalenemethanol (600 MHz,  $\text{CDCl}_3$ )

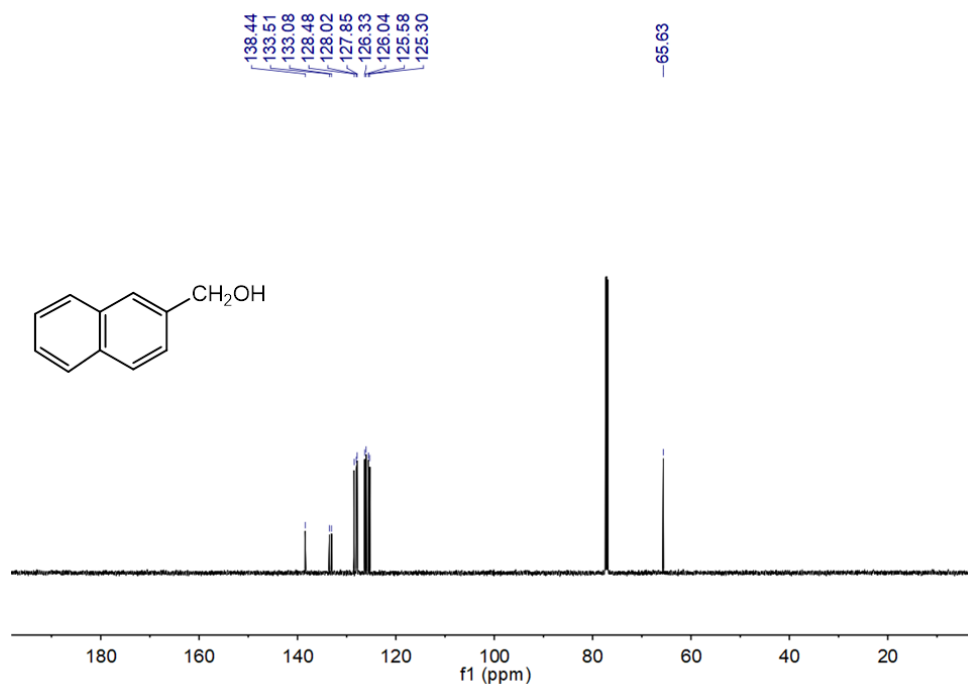

**Fig. S39**  $^{13}\text{C}\{^1\text{H}\}$  NMR spectrum of the isolated 2-naphthalenemethanol (151 MHz,  $\text{CDCl}_3$ )

### 4-Phenylbenzyl alcohol

White solid, 0.164 g, 89% yield, purity: >97% based on  $^1\text{H}$  NMR spectrum.  $^1\text{H}$  NMR (600 MHz,  $\text{CDCl}_3$ ,  $\delta$ ): 7.59–7.61 (m, ArH, 4H), 7.44–7.46 (m, ArH, 4H), 7.34–7.37 (m, ArH, 1H), 4.75 (s,  $\text{CH}_2$ , 2H), 1.73 (s, br., OH, 1H).  $^{13}\text{C}\{^1\text{H}\}$  NMR (151 MHz,  $\text{CDCl}_3$ ,  $\delta$ ): 140.97, 140.81, 140.01, 128.93, 127.61, 127.48, 127.47, 127.24, 65.28. HRMS (ESI):  $m/z$  calculated for  $\text{C}_{13}\text{H}_{13}\text{O}$   $[\text{M} + \text{H}]^+$  185.0961, found 185.0960. These spectral data correspond to previously reported data.<sup>S13</sup>

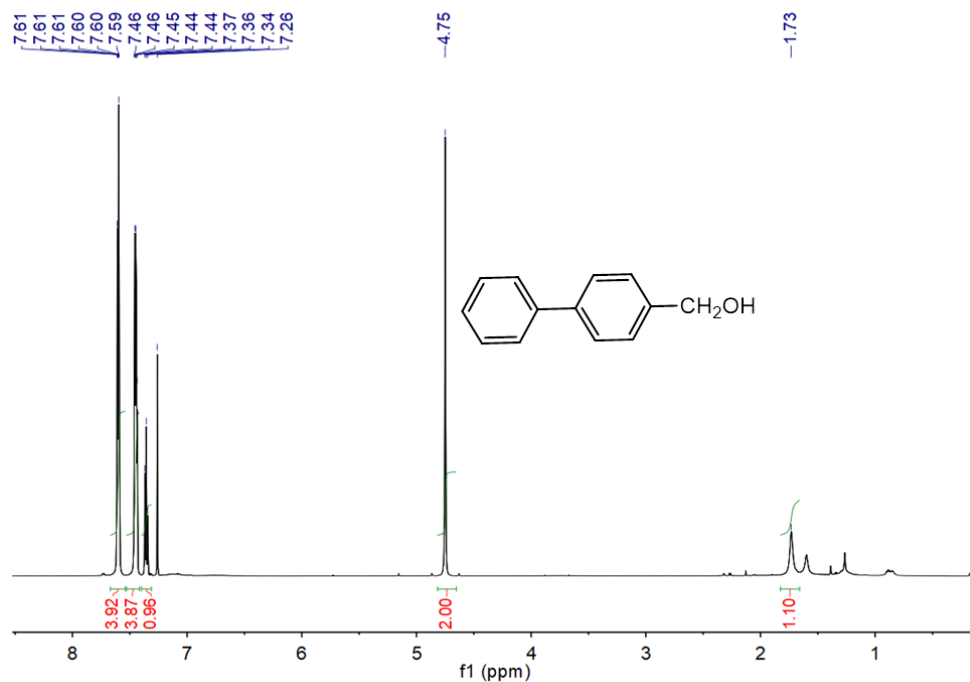

**Fig. S40**  $^1\text{H}$  NMR spectrum of the isolated 4-phenylbenzyl alcohol (600 MHz,  $\text{CDCl}_3$ )

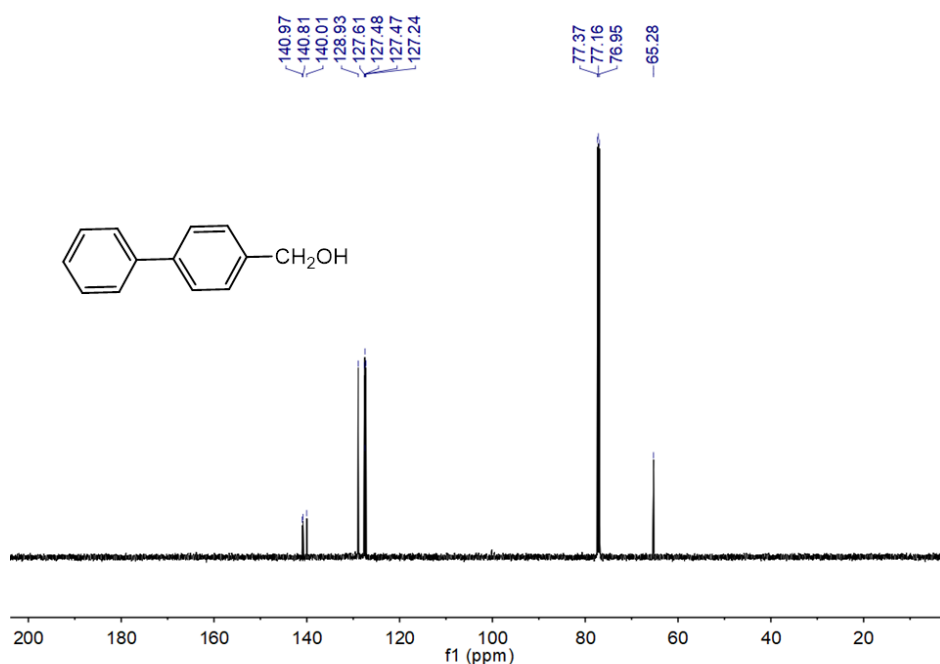

**Fig. S41**  $^{13}\text{C}\{^1\text{H}\}$  NMR spectrum of the isolated 4-phenylbenzyl alcohol (151 MHz,  $\text{CDCl}_3$ )



### 2-Pyridinylmethanol

Clear colorless liquid, 0.087 g, 80% yield, purity: >97% based on  $^1\text{H}$  NMR spectrum.  $^1\text{H}$  NMR (600 MHz,  $\text{CDCl}_3$ ,  $\delta$ ): 8.55 (d,  $J_{\text{H-H}} = 4.7$  Hz, ArH, 1H), 7.68 (t,  $J_{\text{H-H}} = 7.7$  Hz, ArH, 1H), 7.26 (d,  $J_{\text{H-H}} = 7.2$  Hz, ArH, 1H), 7.20 (t,  $J_{\text{H-H}} = 7.7$  Hz, ArH, 1H), 4.76 (s,  $\text{CH}_2$ , 2H), 3.49 (s, br, OH, 1H).  $^{13}\text{C}\{^1\text{H}\}$  NMR (151 MHz,  $\text{CDCl}_3$ ,  $\delta$ ): 159.19, 148.63, 136.84, 122.48, 120.68, 64.27. HRMS (ESI):  $m/z$  calculated for  $\text{C}_6\text{H}_8\text{NO}$   $[\text{M} + \text{H}]^+$  110.0600, found 110.0601. These spectral data correspond to previously reported data.<sup>S14,S15</sup>

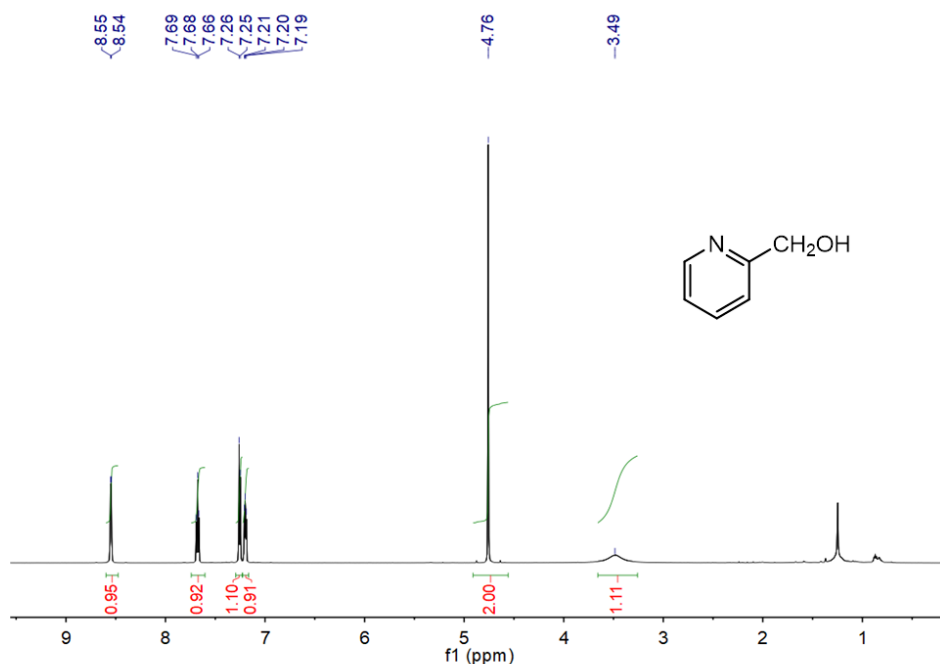

**Fig. S42**  $^1\text{H}$  NMR spectrum of the isolated 2-pyridinylmethanol (600 MHz,  $\text{CDCl}_3$ )

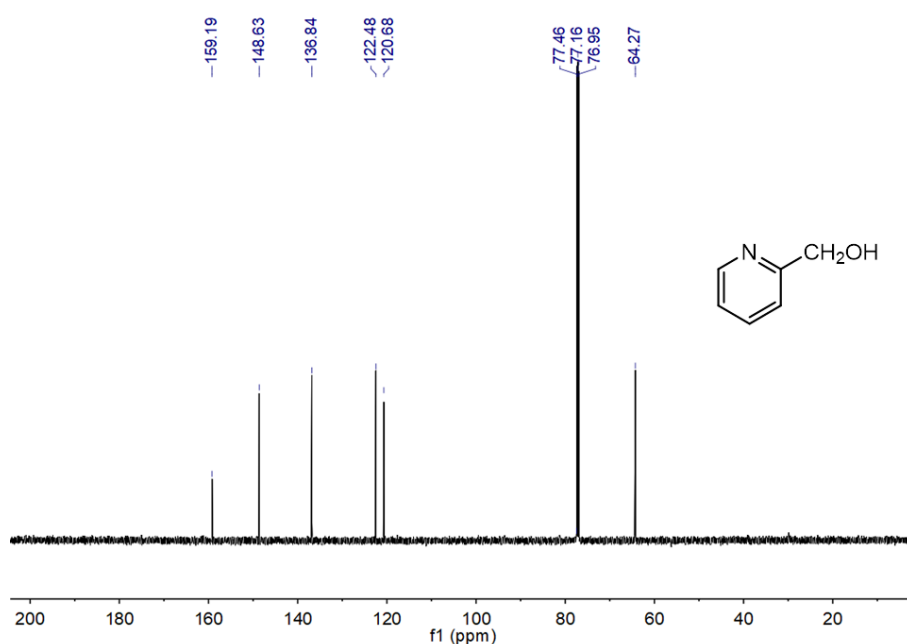

**Fig. S43**  $^{13}\text{C}\{^1\text{H}\}$  NMR spectrum of the isolated 2-pyridinylmethanol (151 MHz,  $\text{CDCl}_3$ )

### 2-Furanmethanol

Clear colorless liquid, 0.091 g, 93% yield, purity: >98% based on  $^1\text{H}$  NMR spectrum.  $^1\text{H}$  NMR (600 MHz,  $\text{CDCl}_3$ ,  $\delta$ ): 7.40 (s, ArH, 1H), 6.33–6.34 (m, ArH, 1H), 6.28–6.29 (m, ArH, 1H), 4.60 (s,  $\text{CH}_2$ , 2H), 2.01 (s, br., OH, 1H).  $^{13}\text{C}\{^1\text{H}\}$  NMR (151 MHz,  $\text{CDCl}_3$ ,  $\delta$ ): 154.11, 142.70, 110.48, 107.89, 57.57. HRMS (ESI):  $m/z$  calculated for  $\text{C}_5\text{H}_7\text{O}_2$   $[\text{M} + \text{H}]^+$  99.0441, found 99.0440. These spectral data correspond to previously reported data.<sup>S6–S9</sup>

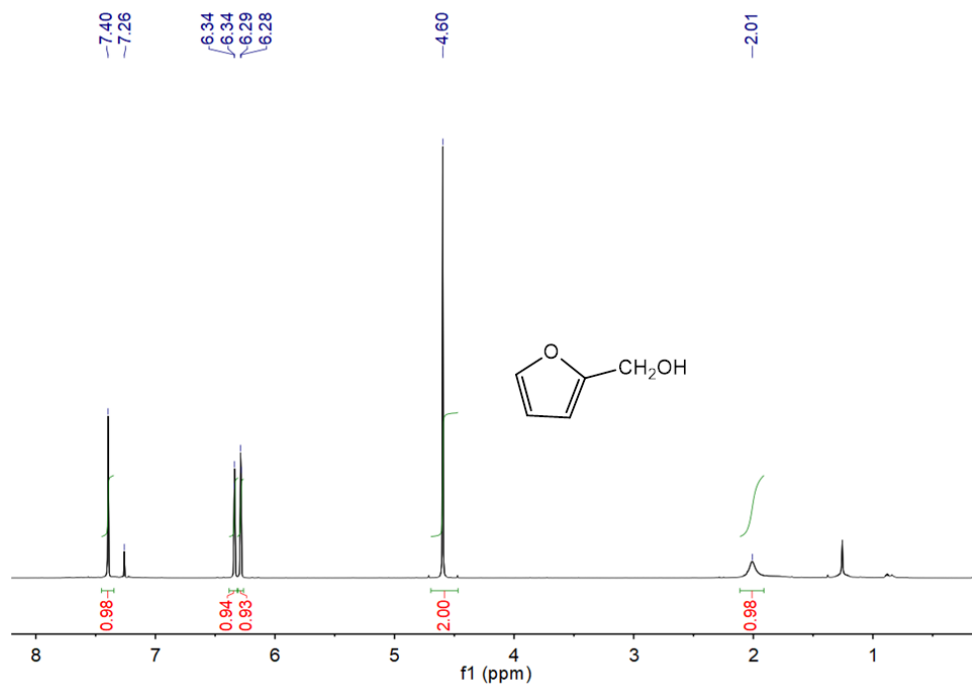

**Fig. S44**  $^1\text{H}$  NMR spectrum of the isolated 2-furanmethanol (600 MHz,  $\text{CDCl}_3$ )

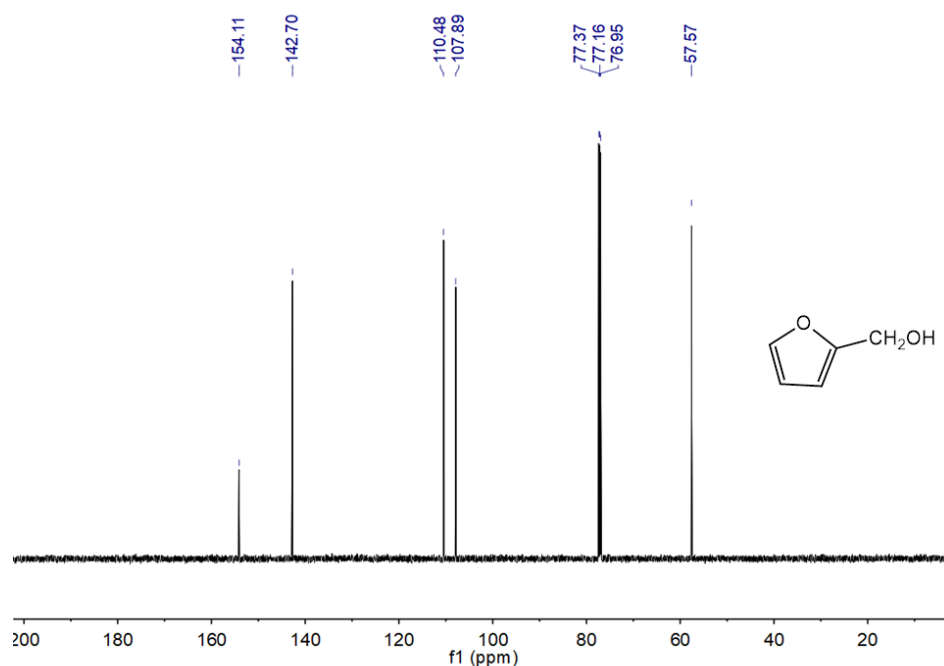

**Fig. S45**  $^{13}\text{C}\{^1\text{H}\}$  NMR spectrum of the isolated 2-furanmethanol (151 MHz,  $\text{CDCl}_3$ )

### 3-Cyclohexene-1-methanol

Clear colorless liquid, 0.097 g, 87% yield, purity: >99% based on  $^1\text{H}$  NMR spectrum.  $^1\text{H}$  NMR (600 MHz,  $\text{CDCl}_3$ ,  $\delta$ ): 5.65–5.59 (m, 2H), 3.50–3.56 (m, 2H), 2.05–2.12 (m, 3H), 1.73–1.82 (m, 3H), 1.55 (s, br., OH, 1H), 1.24–1.31 (m, 1H).  $^{13}\text{C}\{^1\text{H}\}$  NMR (151 MHz,  $\text{CDCl}_3$ ,  $\delta$ ): 127.28, 126.01, 67.98, 36.44, 28.20, 25.33, 24.75. HRMS (ESI):  $m/z$  calculated for  $\text{C}_7\text{H}_{13}\text{O}$   $[\text{M} + \text{H}]^+$  113.0961, found 113.0962. These spectral data correspond to previously reported data.<sup>S14</sup>

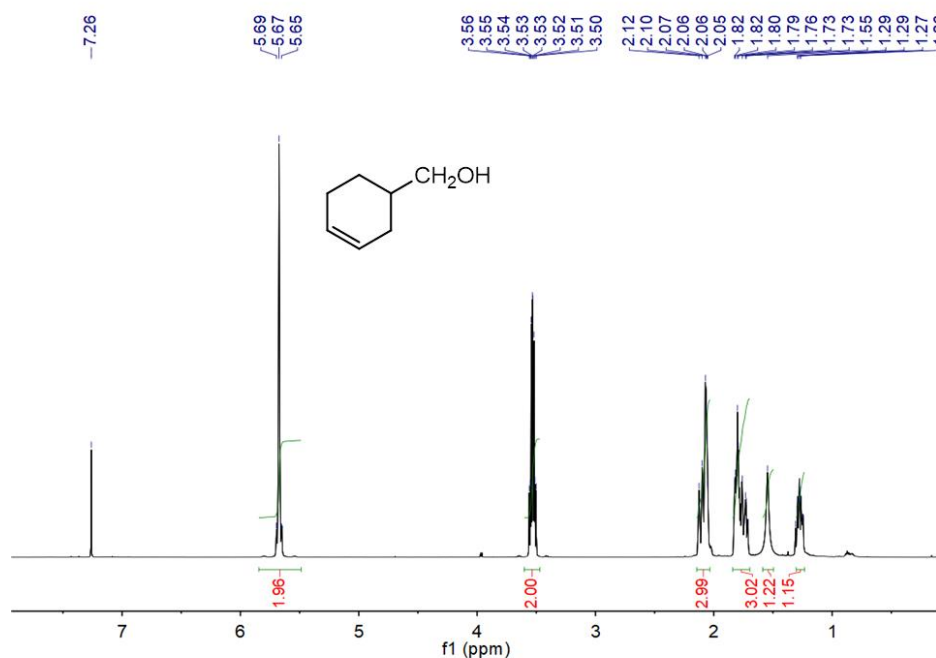

**Fig. S46**  $^1\text{H}$  NMR spectrum of the isolated 3-cyclohexene-1-methanol (600 MHz,  $\text{CDCl}_3$ )

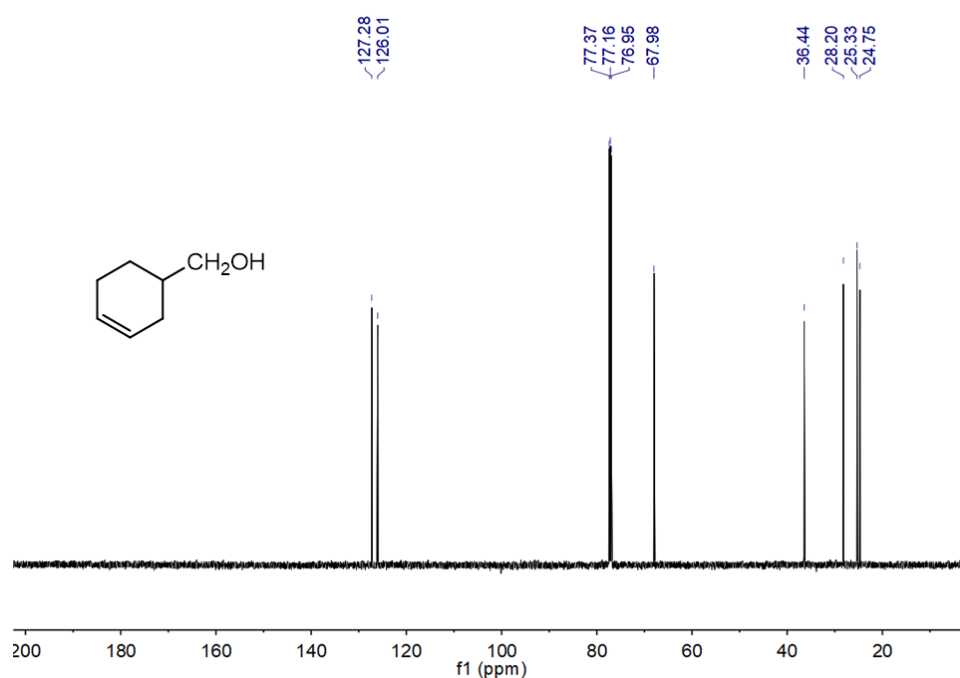

**Fig. S47**  $^{13}\text{C}\{^1\text{H}\}$  NMR spectrum of the isolated 3-cyclohexene-1-methanol (151 MHz,  $\text{CDCl}_3$ )

### 3-Phenylallyl alcohol

Colorless liquid, 0.110 g, 82% yield, purity: >95% based on  $^1\text{H}$  NMR spectrum.  $^1\text{H}$  NMR (600 MHz,  $\text{CDCl}_3$ ,  $\delta$ ): 7.30 (d,  $J_{\text{H-H}} = 7.4$  Hz, ArH, 2H), 7.23 (t,  $J_{\text{H-H}} = 7.5$  Hz, ArH, 2H), 7.16 (t,  $J_{\text{H-H}} = 7.1$  Hz, ArH, 1H), 6.52 (d,  $J_{\text{H-H}} = 15.9$  Hz, CH, 1H), 6.25–6.29 (m, CH, 1H), 4.23 (d,  $J_{\text{H-H}} = 5.3$  Hz,  $\text{CH}_2$ , 2H), 1.88 (s, br., OH, 1H).  $^{13}\text{C}\{^1\text{H}\}$  NMR (151 MHz,  $\text{CDCl}_3$ ,  $\delta$ ): 136.78, 131.21, 128.69, 128.59, 127.78, 126.57, 63.76. HRMS (ESI):  $m/z$  calculated for  $\text{C}_9\text{H}_{11}\text{O}$   $[\text{M} + \text{H}]^+$  135.0804, found 135.0803. These spectral data correspond to previously reported data.<sup>S8,S16,S17</sup>

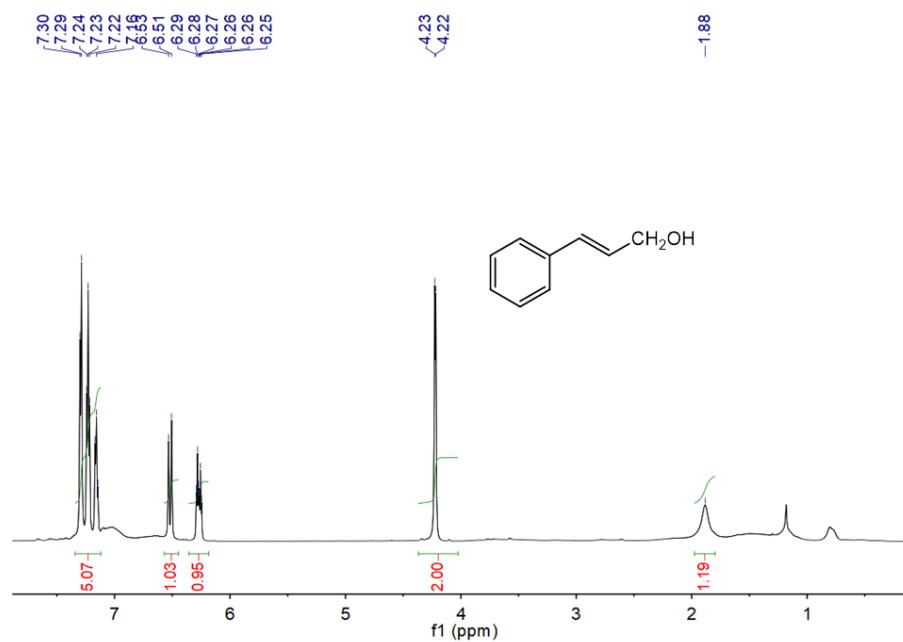

Fig. S48  $^1\text{H}$  NMR spectrum of the isolated 3-phenylallyl alcohol (600 MHz,  $\text{CDCl}_3$ )

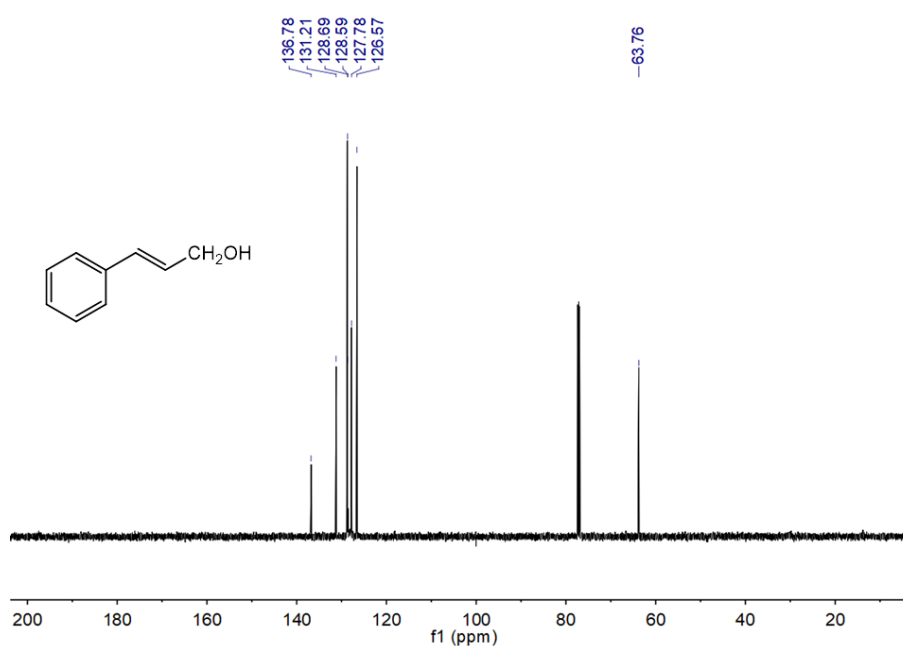

Fig. S49  $^{13}\text{C}\{^1\text{H}\}$  NMR spectrum of the isolated 3-phenylallyl alcohol (151 MHz,  $\text{CDCl}_3$ )

### 3-Phenyl-2-propynyl alcohol

Light yellow liquid, 0.121 g, 92% yield, purity: >96% based on  $^1\text{H}$  NMR spectrum.  $^1\text{H}$  NMR (600 MHz,  $\text{CDCl}_3$ ,  $\delta$ ): 7.44–7.45 (m, ArH, 2H), 7.30–7.32 (m, ArH, 3H), 4.50 (s,  $\text{CH}_2$ , 2H), 1.98 (s, br., OH, 1H).  $^{13}\text{C}\{^1\text{H}\}$  NMR (151 MHz,  $\text{CDCl}_3$ ,  $\delta$ ): 131.81, 128.62, 128.44, 122.66, 87.34, 85.81, 77.16, 76.95, 51.75. HRMS (ESI):  $m/z$  calculated for  $\text{C}_9\text{H}_9\text{O}$   $[\text{M} + \text{H}]^+$  133.0648, found 133.0645. These spectral data correspond to previously reported data.<sup>S16</sup>

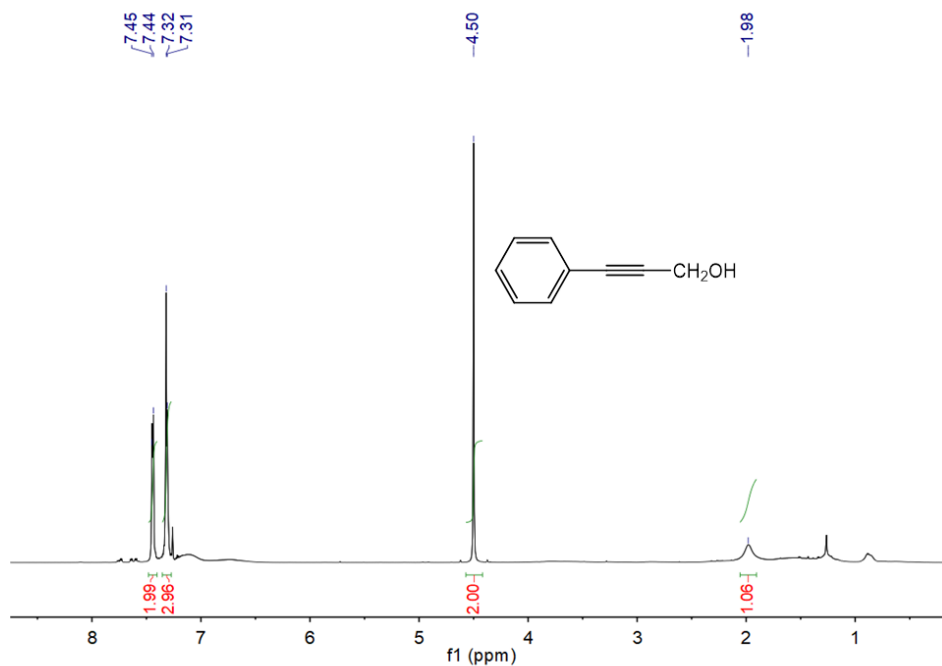

**Fig. S50**  $^1\text{H}$  NMR spectrum of the isolated 3-phenyl-2-propynyl alcohol (600 MHz,  $\text{CDCl}_3$ )

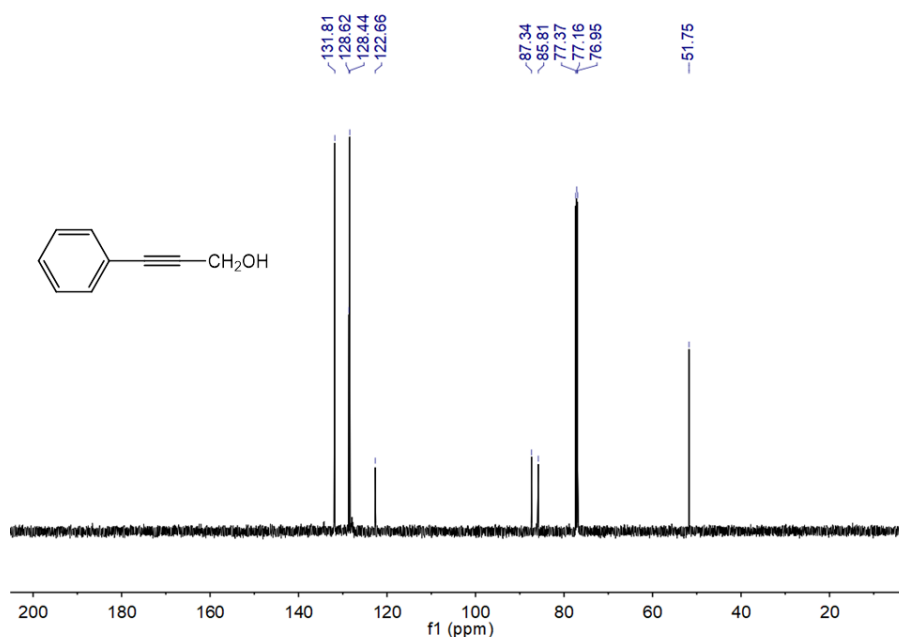

**Fig. S51**  $^{13}\text{C}\{^1\text{H}\}$  NMR spectrum of the isolated 3-phenyl-2-propynyl alcohol (151 MHz,  $\text{CDCl}_3$ )

*3,7-Dimethyl-trans-2,6-octadien-1-ol*

Light yellow liquid, 0.112 g, 73% yield, purity: >98% based on  $^1\text{H}$  NMR spectrum.  $^1\text{H}$  NMR (600 MHz,  $\text{CDCl}_3$ ,  $\delta$ ): 5.40–5.43 (m, 1H), 5.08–5.11 (m, 1H), 4.16 (d,  $J_{\text{H-H}} = 6.9$  Hz,  $\text{CH}_2$ , 2H), 2.08–2.12 (m, 2H), 2.02–2.04 (m, 2H), 1.68 (s,  $\text{CH}_3$ , 6H), 1.60 (s,  $\text{CH}_3$ , 3H), 1.25 (s, br., OH, 1H).  $^{13}\text{C}\{^1\text{H}\}$  NMR (151 MHz,  $\text{CDCl}_3$ ,  $\delta$ ): 139.97, 131.90, 124.03, 123.45, 59.57, 39.68, 26.53, 25.82, 17.83, 16.41. HRMS (ESI):  $m/z$  calculated for  $\text{C}_{10}\text{H}_{19}\text{O}$   $[\text{M} + \text{H}]^+$  155.1430, found 155.1432. These spectral data correspond to previously reported data.<sup>S17,S18</sup>

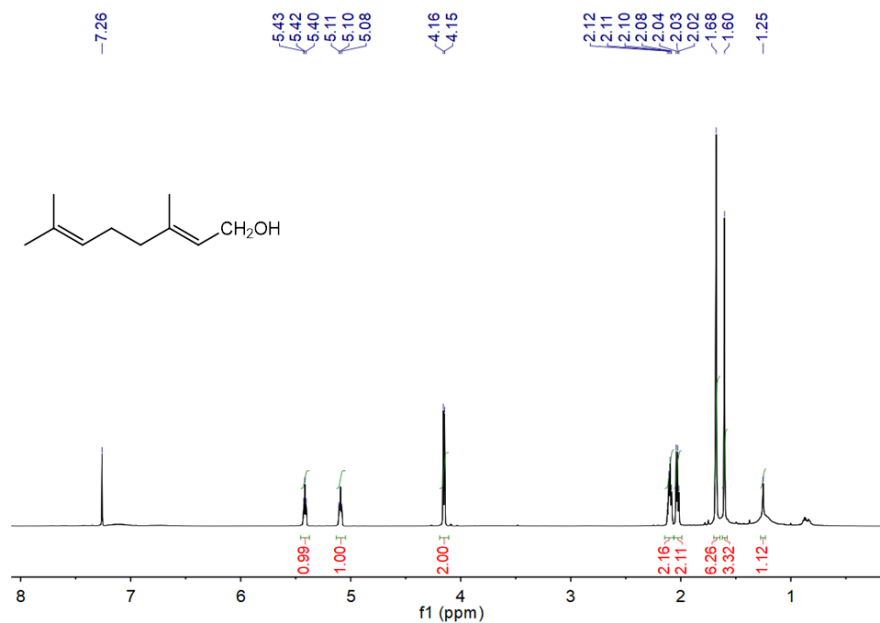

**Fig. S52**  $^1\text{H}$  NMR spectrum of the isolated 3,7-dimethyl-trans-2,6-octadien-1-ol (600 MHz,  $\text{CDCl}_3$ )

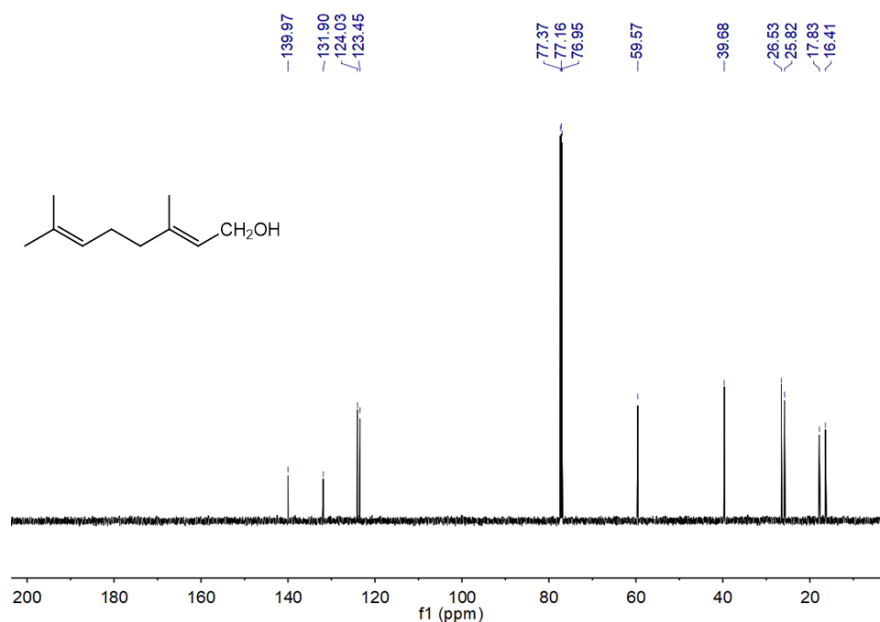

**Fig. S53**  $^{13}\text{C}\{^1\text{H}\}$  NMR spectrum of the isolated 3,7-dimethyl-trans-2,6-octadien-1-ol (151 MHz,  $\text{CDCl}_3$ )

### 1-Phenylethanol

Clear colorless liquid, 0.110 g, 90% yield, purity: >98% based on  $^1\text{H}$  NMR spectra.  $^1\text{H}$  NMR (600 MHz,  $\text{CDCl}_3$ ,  $\delta$ ): 7.34–7.39 (m, ArH, 4H), 7.26–7.29 (m, ArH, 1H), 4.91 (quart,  $J_{\text{H-H}}=6.5$  Hz,  $\text{CH}(\text{OH})\text{CH}_3$ , 1H), 1.90 (s, br., OH, 1H), 1.51 (d,  $J_{\text{H-H}} = 6.5$  Hz,  $\text{CH}_3$ , 3H).  $^{13}\text{C}\{^1\text{H}\}$  NMR (151 MHz,  $\text{CDCl}_3$ ,  $\delta$ ): 145.94, 128.62, 127.59, 125.51, 70.53, 25.27. HRMS (ESI):  $m/z$  calculated for  $\text{C}_8\text{H}_{11}\text{O}$   $[\text{M} + \text{H}]^+$  123.0804, found 123.0803. These spectral data correspond to previously reported data.<sup>S7,S8</sup>

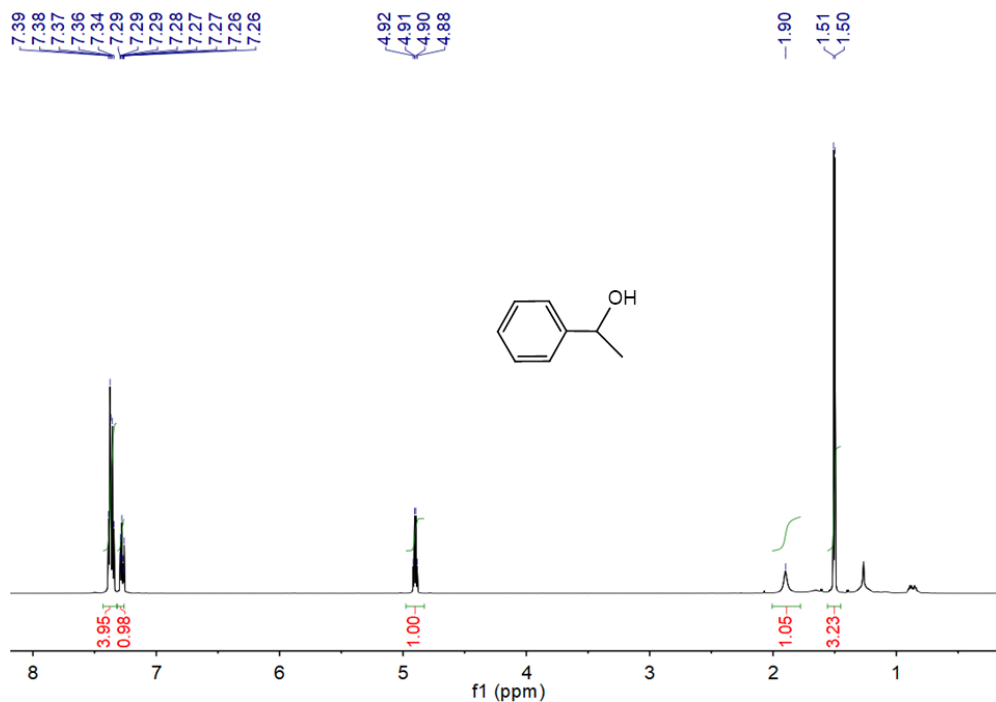

**Fig. S54**  $^1\text{H}$  NMR spectrum of the isolated 1-phenylethanol (600 MHz,  $\text{CDCl}_3$ )

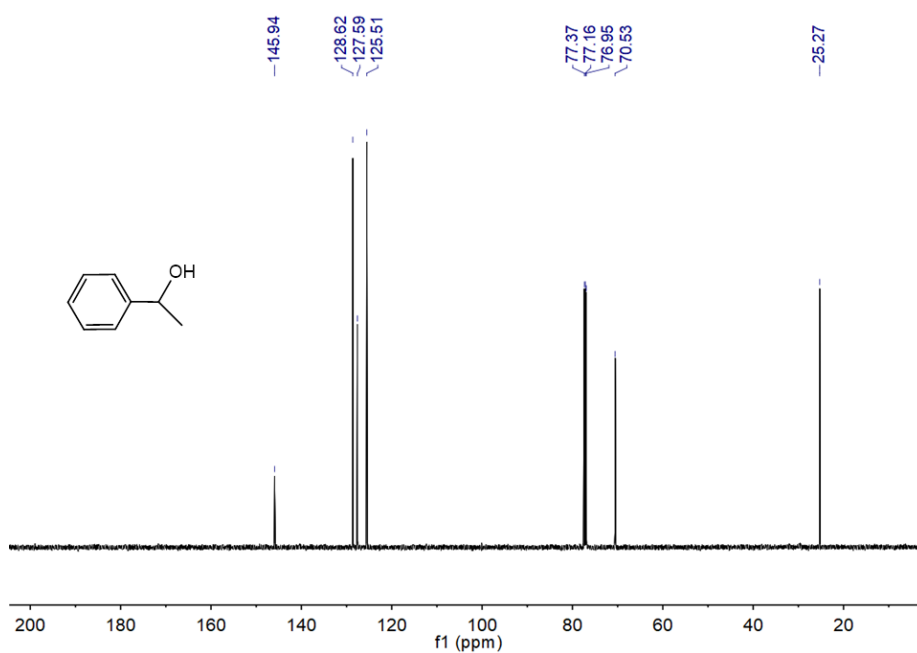

**Fig. S55**  $^{13}\text{C}\{^1\text{H}\}$  NMR spectrum of the isolated 1-phenylethanol (151 MHz,  $\text{CDCl}_3$ )

### 1-(p-Tolyl)ethanol

Clear colorless liquid, 0.117g, 86% yield, purity: >97% based on  $^1\text{H}$  NMR spectra.  $^1\text{H}$  NMR (600 MHz,  $\text{CDCl}_3$ ,  $\delta$ ): 7.27 (d,  $J_{\text{H-H}} = 8.0$  Hz, ArH, 2H), 7.17 (d,  $J_{\text{H-H}} = 7.9$  Hz, ArH, 2H), 4.88 (quart,  $J_{\text{H-H}} = 6.4$  Hz,  $\text{CH}(\text{OH})\text{CH}_3$ , 1H), 2.35 (s, Ar $\text{CH}_3$ , 3H), 1.73 (s, br, OH, 1H), 1.49 (d,  $J_{\text{H-H}} = 6.5$  Hz,  $\text{CH}(\text{OH})\text{CH}_3$ , 3H).  $^{13}\text{C}\{^1\text{H}\}$  NMR (151 MHz,  $\text{CDCl}_3$ ,  $\delta$ ): 142.99, 137.27, 129.29, 125.48, 70.38, 25.20, 21.21. HRMS (ESI):  $m/z$  calculated for  $\text{C}_9\text{H}_{13}\text{O}$   $[\text{M} + \text{H}]^+$  137.0961, found 137.0960. These spectral data correspond to previously reported data.<sup>S19,S20</sup>

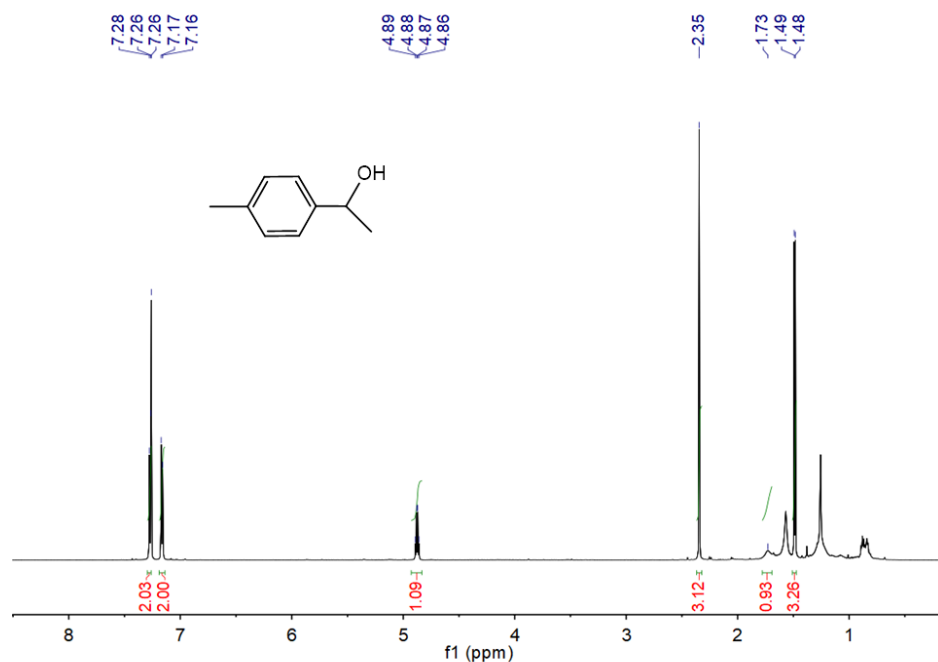

**Fig. S56**  $^1\text{H}$  NMR spectrum of the isolated 1-(p-tolyl)ethanol (600 MHz,  $\text{CDCl}_3$ )

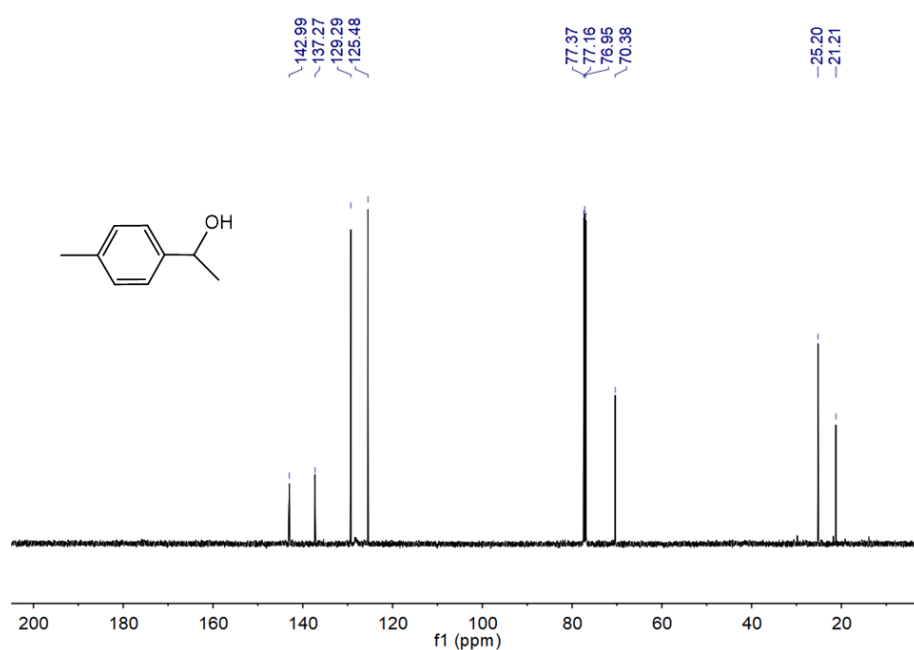

**Fig. S57**  $^{13}\text{C}\{^1\text{H}\}$  NMR spectrum of the isolated 1-(p-tolyl)ethanol (151 MHz,  $\text{CDCl}_3$ )



### 4-Methoxy- $\alpha$ -methylbenzyl alcohol

Clear colorless liquid, 0.135 g, 89% yield, purity: >99% based on  $^1\text{H}$  NMR spectra.  $^1\text{H}$  NMR (600 MHz,  $\text{CDCl}_3$ ,  $\delta$ ): 7.30 (d,  $J_{\text{H-H}} = 8.6$  Hz, ArH, 2H), 6.88 (d,  $J_{\text{H-H}} = 8.6$  Hz, ArH, 2H), 4.85 (quart,  $J_{\text{H-H}} = 6.4$  Hz,  $\text{CH}(\text{OH})\text{CH}_3$ , 1H), 3.80 (s,  $\text{OCH}_3$ , 3H), 1.88 (s, br, OH, 1H), 1.48 (d,  $J_{\text{H-H}} = 6.4$  Hz,  $\text{CH}(\text{OH})\text{CH}_3$ , 3H).  $^{13}\text{C}\{^1\text{H}\}$  NMR (151 MHz,  $\text{CDCl}_3$ ,  $\delta$ ): 159.10, 138.14, 126.79, 113.97, 70.10, 55.42, 25.14. HRMS (ESI):  $m/z$  calculated for  $\text{C}_9\text{H}_{13}\text{O}_2$   $[\text{M} + \text{H}]^+$  153.0910, found 153.0913. These spectral data correspond to previously reported data.<sup>S16,S19</sup>

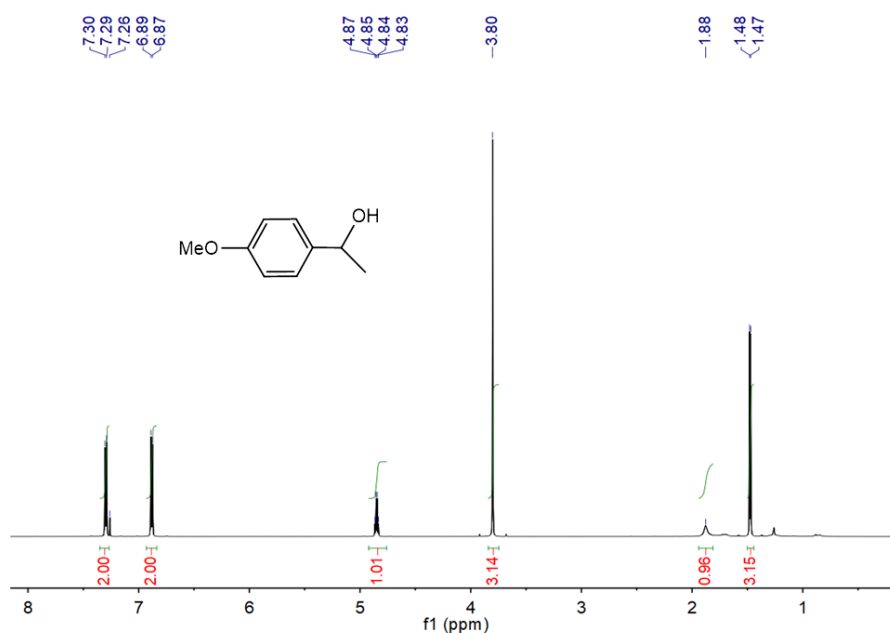

**Fig. S58**  $^1\text{H}$  NMR spectrum of the isolated 4-methoxy- $\alpha$ -methylbenzyl alcohol (600 MHz,  $\text{CDCl}_3$ )

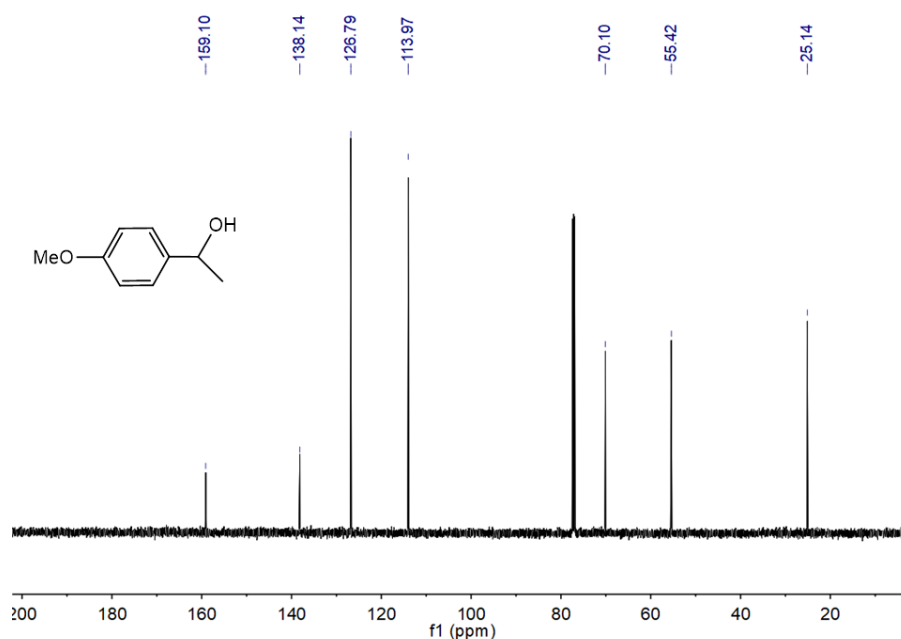

**Fig. S59**  $^{13}\text{C}\{^1\text{H}\}$  NMR spectrum of the isolated 4-methoxy- $\alpha$ -methylbenzyl alcohol (151 MHz,  $\text{CDCl}_3$ )

### 1-(4-Bromophenyl)ethanol

Clear colorless liquid, 0.141 g, 71% yield, purity: >99% based on  $^1\text{H}$  NMR spectra.  $^1\text{H}$  NMR (600 MHz,  $\text{CDCl}_3$ ,  $\delta$ ): 7.47 (d,  $J_{\text{H-H}} = 8.4$  Hz, Ar, 2H), 7.25 (d,  $J_{\text{H-H}} = 8.4$  Hz, Ar, 2H), 4.87 (quart,  $J_{\text{H-H}} = 6.5$  Hz,  $\text{CH}(\text{OH})\text{CH}_3$ , 1H), 1.87 (s, br, OH, 1H), 1.47 (d,  $J_{\text{H-H}} = 6.5$  Hz,  $\text{CH}(\text{OH})\text{CH}_3$ , 3H).  $^{13}\text{C}\{^1\text{H}\}$  NMR (151 MHz,  $\text{CDCl}_3$ ,  $\delta$ ): 144.90, 131.70, 127.29, 121.30, 69.93, 25.39. HRMS (ESI):  $m/z$  calculated for  $\text{C}_8\text{H}_9\text{BrONa}$   $[\text{M} + \text{Na}]^+$  222.9729, found 222.9731. These spectral data correspond to previously reported data.<sup>S19</sup>

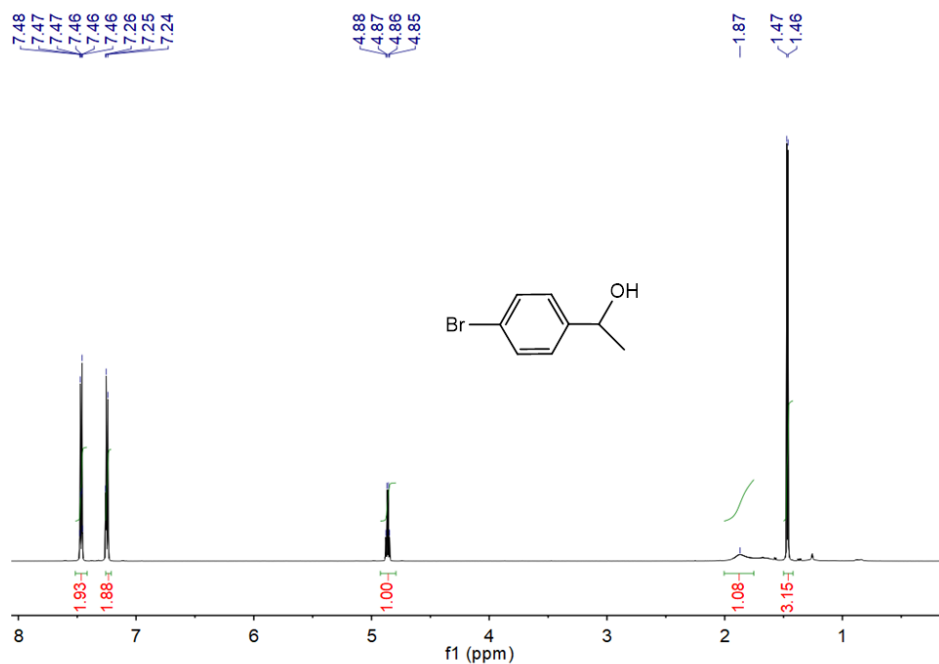

**Fig. S60**  $^1\text{H}$  NMR spectrum of the isolated 1-(4-bromophenyl)ethanol (600 MHz,  $\text{CDCl}_3$ )

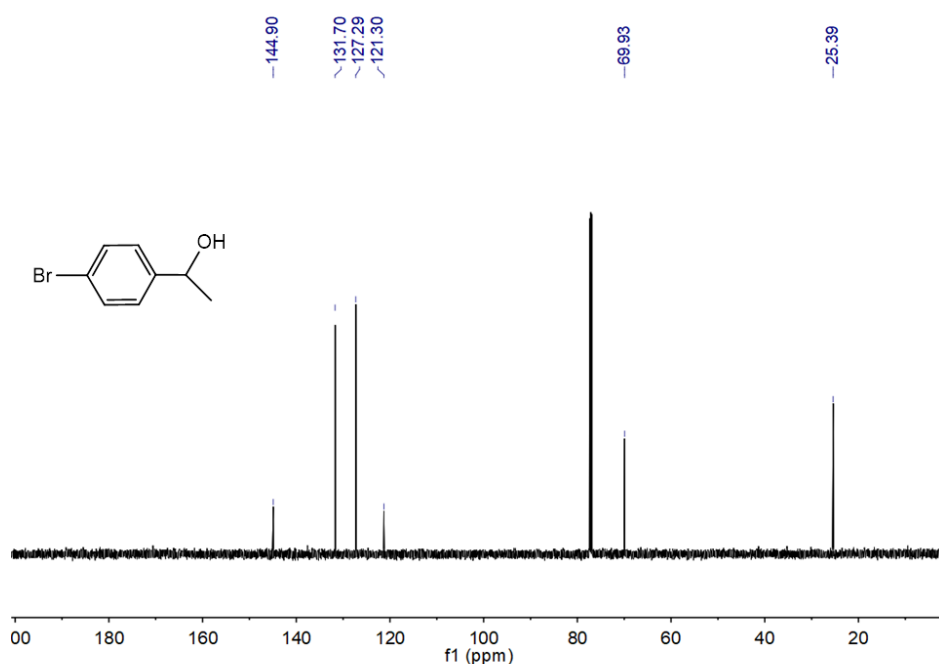

**Fig. S61**  $^{13}\text{C}\{^1\text{H}\}$  NMR spectrum of the isolated 1-(4-bromophenyl)ethanol (151 MHz,  $\text{CDCl}_3$ )

### 1-(4-Chlorophenyl)ethanol

Clear colorless liquid, 0.120 g, 77% yield, purity: >99% based on  $^1\text{H}$  NMR spectra.  $^1\text{H}$  NMR (600 MHz,  $\text{CDCl}_3$ ,  $\delta$ ): 7.30–7.33 (m, ArH, 4H), 4.89 (quart,  $J_{\text{H-H}} = 6.5$  Hz,  $\text{CH}(\text{OH})\text{CH}_3$ , 1H), 1.82 (br., OH, 1H), 1.48 (d,  $J_{\text{H-H}} = 6.5$  Hz,  $\text{CH}(\text{OH})\text{CH}_3$ , 3H).  $^{13}\text{C}\{^1\text{H}\}$  NMR (151 MHz,  $\text{CDCl}_3$ ,  $\delta$ ): 144.39, 133.19, 128.73, 126.93, 69.87, 25.41. HRMS (ESI):  $m/z$  calculated for  $\text{C}_8\text{H}_{10}\text{ClO}$   $[\text{M} + \text{H}]^+$  157.0415, found 157.0415. These spectral data correspond to previously reported data.<sup>S8,S19</sup>

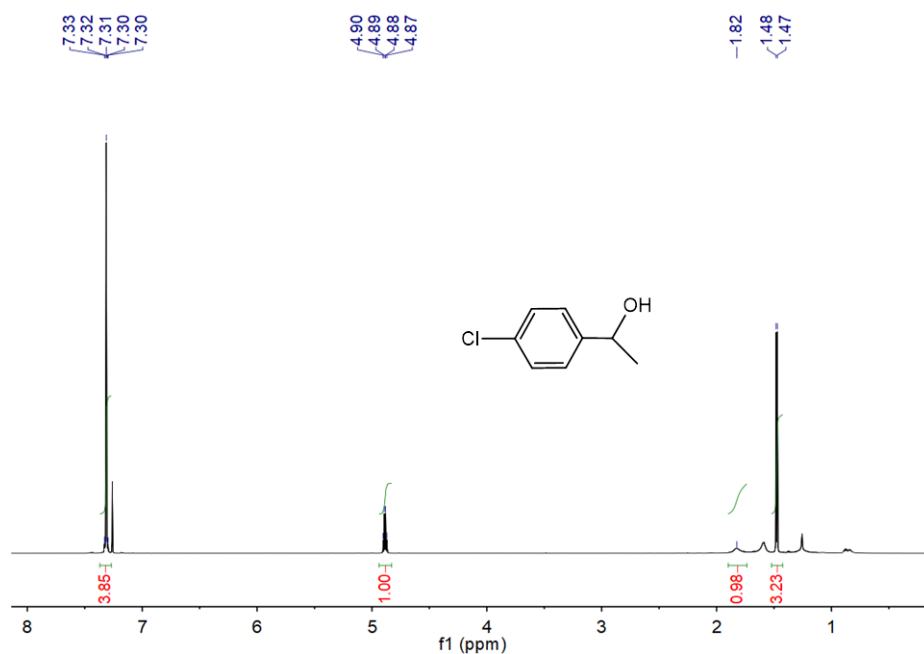

**Fig. S62**  $^1\text{H}$  NMR spectrum of the isolated 1-(4-chlorophenyl)ethanol (600 MHz,  $\text{CDCl}_3$ )

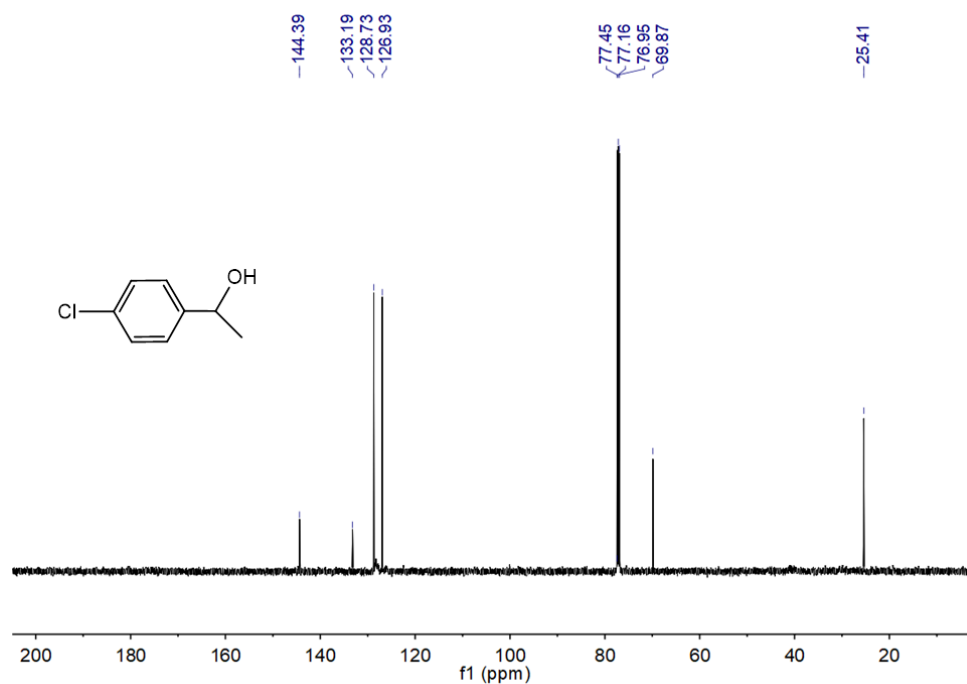

**Fig. S63**  $^{13}\text{C}\{^1\text{H}\}$  NMR spectrum of the isolated 1-(4-chlorophenyl)ethanol (151 MHz,  $\text{CDCl}_3$ )

*1,2,3,4-Tetrahydro-1-naphthalenol*

Clear colorless liquid, 0.129 g, 87% yield, purity: >97% based on  $^1\text{H}$  NMR spectra.  $^1\text{H}$  NMR (600 MHz,  $\text{CDCl}_3$ ,  $\delta$ ): 7.43–7.44 (m, ArH, 1H), 7.19–7.22 (m, ArH, 2H), 7.10–7.12 (m, ArH, 1H), 4.78 (t,  $J_{\text{H-H}} = 4.8$  Hz, CH(OH), 1H), 2.81–2.86 (m,  $\text{CH}_2$ , 1H), 2.71–2.76 (m,  $\text{CH}_2$ , 1H), 1.95–2.03 (m,  $\text{CH}_2$ , OH, 3H), 1.89–1.93 (m,  $\text{CH}_2$ , 1H), 1.76–1.81 (m,  $\text{CH}_2$ , 1H).  $^{13}\text{C}\{^1\text{H}\}$  NMR (151 MHz,  $\text{CDCl}_3$ ,  $\delta$ ): 138.88, 137.20, 129.08, 128.76, 127.64, 126.25, 68.21, 32.34, 29.33, 18.90. HRMS (ESI):  $m/z$  calculated for  $\text{C}_{10}\text{H}_{13}\text{O}$   $[\text{M} + \text{H}]^+$  149.0961, found 149.0962. These spectral data correspond to previously reported data.<sup>S7,S19</sup>

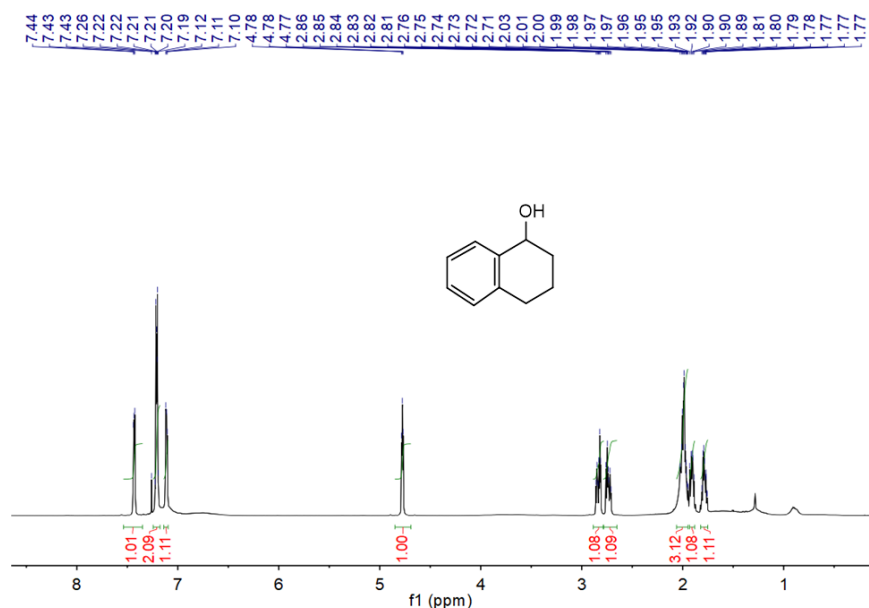

**Fig. S64**  $^1\text{H}$  NMR spectrum of the isolated 1,2,3,4-tetrahydro-1-naphthalenol (600 MHz,  $\text{CDCl}_3$ )

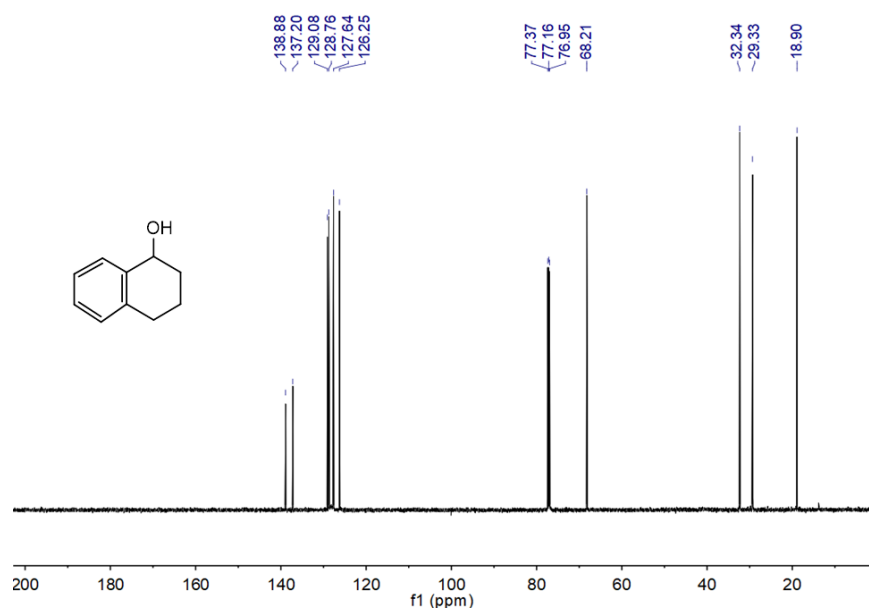

**Fig. S65**  $^{13}\text{C}\{^1\text{H}\}$  NMR spectrum of the isolated 1,2,3,4-tetrahydro-1-naphthalenol (151 MHz,  $\text{CDCl}_3$ )

*$\alpha$ -Methyl-4-(trifluoromethyl)benzyl alcohol*

Light yellow liquid, 0.143 g, 75% yield, purity: >97% based on  $^1\text{H}$  NMR spectra.  $^1\text{H}$  NMR (600 MHz,  $\text{CDCl}_3$ ,  $\delta$ ): 7.60 (d,  $J_{\text{H-H}} = 8.1$  Hz, ArH, 2H), 7.48 (d,  $J_{\text{H-H}} = 8.1$  Hz, ArH, 2H), 4.95 (quart,  $J_{\text{H-H}} = 6.5$  Hz,  $\text{CH}(\text{OH})\text{CH}_3$ , 1H), 2.20 (s, br, OH, 1H), 1.50 (d,  $J_{\text{H-H}} = 6.5$  Hz,  $\text{CH}_3$ , 3H).  $^{13}\text{C}\{^1\text{H}\}$  NMR (151 MHz,  $\text{CDCl}_3$ ,  $\delta$ ): 149.83, 129.73 (q,  $^2J_{\text{C-F}} = 32$  Hz), 125.78, 125.65 (q,  $^3J_{\text{C-F}} = 4$  Hz), 124.30 (q,  $^1J_{\text{C-F}} = 272$  Hz), 69.93, 25.49. HRMS (ESI):  $m/z$  calculated for  $\text{C}_9\text{H}_{10}\text{F}_3\text{O}$   $[\text{M} + \text{H}]^+$  191.0678, found 191.0679. These spectral data correspond to previously reported data.<sup>S7,S20</sup>

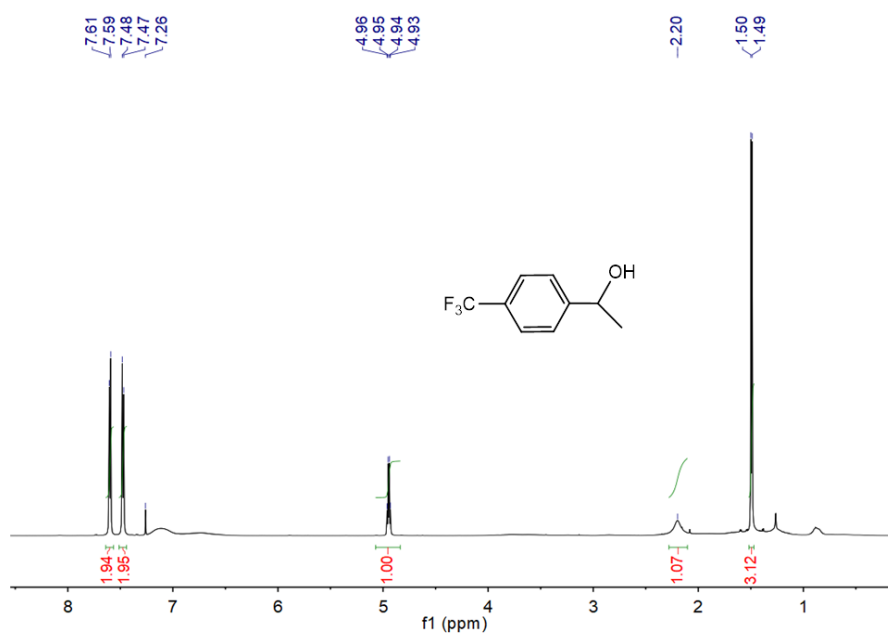

**Fig. S66**  $^1\text{H}$  NMR spectrum of the isolated  $\alpha$ -methyl-4-(trifluoromethyl)benzyl alcohol (600 MHz,  $\text{CDCl}_3$ )

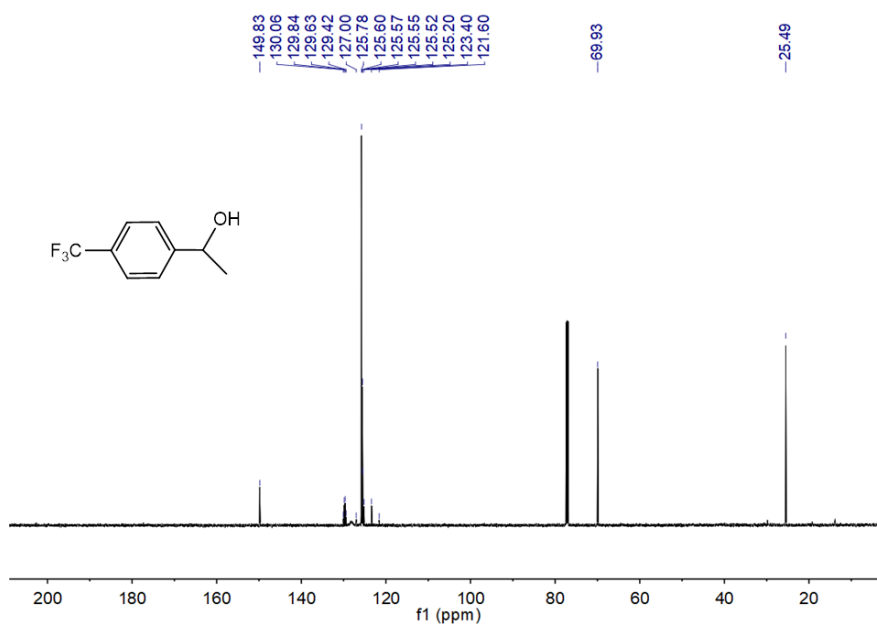

**Fig. S67**  $^{13}\text{C}\{^1\text{H}\}$  NMR spectrum of the isolated  $\alpha$ -methyl-4-(trifluoromethyl)benzyl alcohol (151 MHz,  $\text{CDCl}_3$ )

### 4,4'-Difluorobenzhydryl alcohol

Colorless crystalline solid, 0.154 g, 70% yield, purity: >96% based on  $^1\text{H}$  NMR spectra.  $^1\text{H}$  NMR (600 MHz,  $\text{CDCl}_3$ ,  $\delta$ ): 7.30–7.33 (m, ArH, 4H), 7.01–7.04 (m, ArH, 4H), 5.80 (s, CH(OH), 1H), 2.42 (s, br., OH, 1H).  $^{13}\text{C}\{^1\text{H}\}$  NMR (151 MHz,  $\text{CDCl}_3$ ,  $\delta$ ): 162.35 (d,  $^1J_{\text{C-F}} = 246$  Hz), 139.55 (d,  $^4J_{\text{C-F}} = 3$  Hz), 128.30 (d,  $^3J_{\text{C-F}} = 8$  Hz), 115.52 (d,  $^2J_{\text{C-F}} = 22$  Hz), 75.05. HRMS (ESI):  $m/z$  calculated for  $\text{C}_{13}\text{H}_{10}\text{F}_2\text{ONa}$   $[\text{M} + \text{Na}]^+$  243.0592, found 243.0591. These spectral data correspond to previously reported data.<sup>S12</sup>

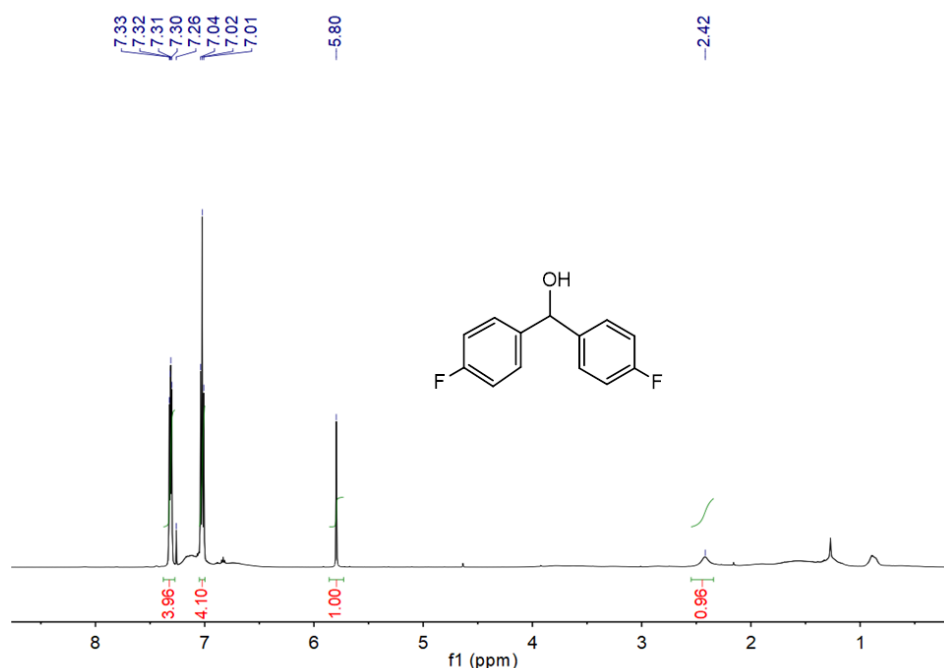

**Fig. S68**  $^1\text{H}$  NMR spectrum of the isolated 4,4'-difluorobenzhydryl alcohol (600 MHz,  $\text{CDCl}_3$ )

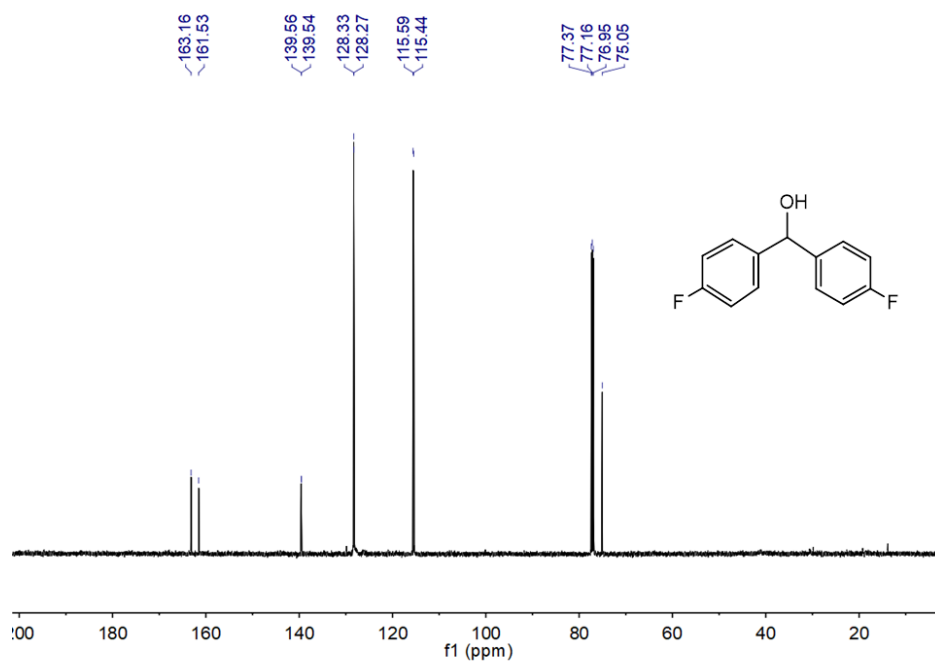

**Fig. S69**  $^{13}\text{C}\{^1\text{H}\}$  NMR spectrum of the isolated 4,4'-difluorobenzhydryl alcohol (151 MHz,  $\text{CDCl}_3$ )

### 4-Bromo- $\alpha$ -phenylbenzenemethanol

Colorless crystalline solid, 0.183 g, 70% yield, purity: >97% based on  $^1\text{H}$  NMR spectra.  $^1\text{H}$  NMR (600 MHz,  $\text{CDCl}_3$ ,  $\delta$ ): 7.45–7.47 (m, ArH, 2H), 7.33–7.36 (m, ArH, 4H), 7.28–7.31 (m, ArH, 1H), 7.24–7.26 (m, ArH, 2H), 5.76 (s, CH(OH), 1H), 2.46 (s, br., OH, 1H).  $^{13}\text{C}\{^1\text{H}\}$  NMR (151 MHz,  $\text{CDCl}_3$ ,  $\delta$ ): 143.44, 142.82, 131.64, 128.76, 128.33, 127.98, 126.64, 121.51, 75.73. HRMS (ESI):  $m/z$  calculated for  $\text{C}_{13}\text{H}_{11}\text{BrONa}$   $[\text{M} + \text{Na}]^+$  284.9885, found 284.9884. These spectral data correspond to previously reported data.<sup>S20</sup>

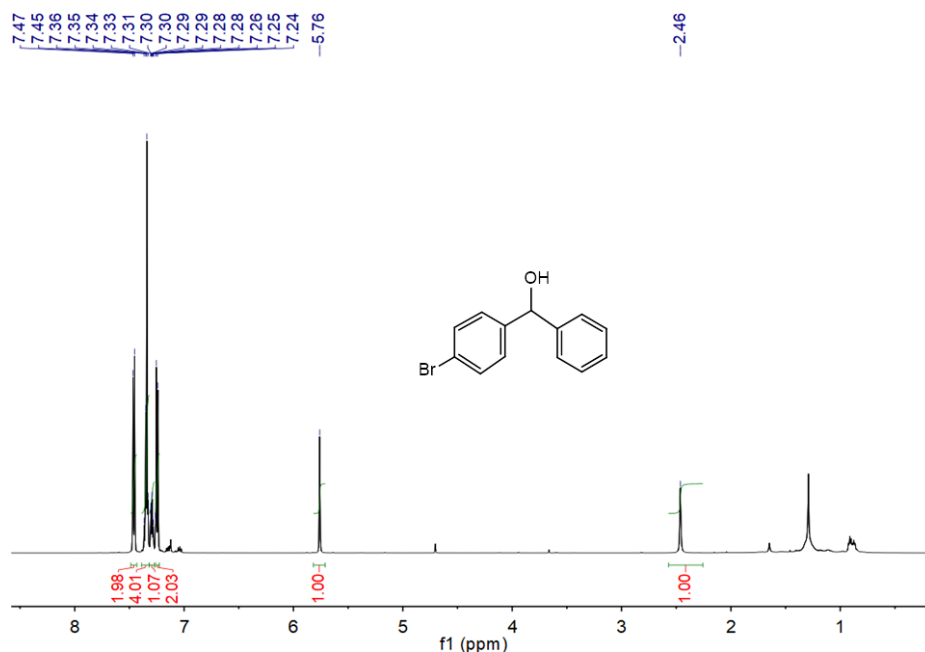

**Fig. S70**  $^1\text{H}$  NMR spectrum of the isolated 4-bromo- $\alpha$ -phenylbenzenemethanol (600 MHz,  $\text{CDCl}_3$ )

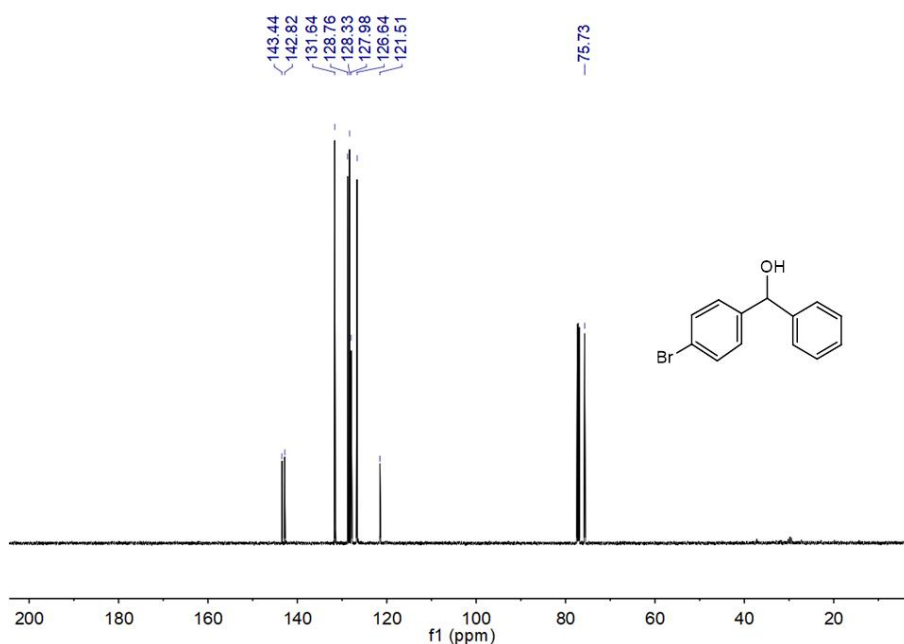

**Fig. S71**  $^{13}\text{C}\{^1\text{H}\}$  NMR spectrum of the isolated 4-bromo- $\alpha$ -phenylbenzenemethanol (151 MHz,  $\text{CDCl}_3$ )

### 4-Phenyl-3-buten-2-ol

Colorless crystalline solid, 0.121 g, 82% yield, purity: >96% based on  $^1\text{H}$  NMR spectrum.  $^1\text{H}$  NMR (600 MHz,  $\text{CDCl}_3$ ,  $\delta$ ): 7.42 (d,  $J_{\text{H-H}} = 7.6$  Hz, ArH, 2H), 7.35 (t,  $J_{\text{H-H}} = 7.6$  Hz, ArH, 2H), 7.28 (d,  $J_{\text{H-H}} = 7.5$  Hz, ArH, 1H), 6.60 (d,  $J_{\text{H-H}} = 15.9$  Hz, CH, 1H), 6.26 (dd,  $J_{\text{H-H}} = 15.9$  and 6.4 Hz, CH, 1H), 4.52 (quint,  $J_{\text{H-H}} = 6.3$  Hz, CH(OH), 1H), 1.86 (s, br, OH, 1H), 1.41 (d,  $J_{\text{H-H}} = 6.4$  Hz,  $\text{CH}_3$ , 3H).  $^{13}\text{C}\{^1\text{H}\}$  NMR (151 MHz,  $\text{CDCl}_3$ ,  $\delta$ ): 136.81, 133.66, 129.52, 128.70, 127.75, 126.57, 69.17, 23.53. HRMS (ESI):  $m/z$  calculated for  $\text{C}_{10}\text{H}_{13}\text{O}$   $[\text{M} + \text{H}]^+$  149.0961, found 149.0960. These spectral data correspond to previously reported data.<sup>S21</sup>

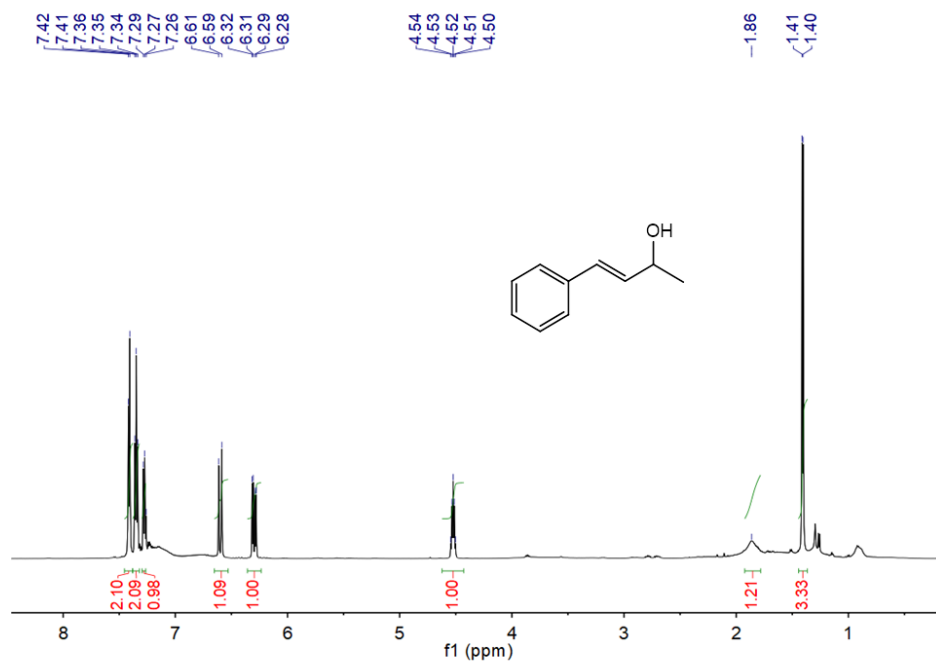

Fig. S72  $^1\text{H}$  NMR spectrum of the isolated 4-phenyl-3-buten-2-ol (600 MHz,  $\text{CDCl}_3$ )

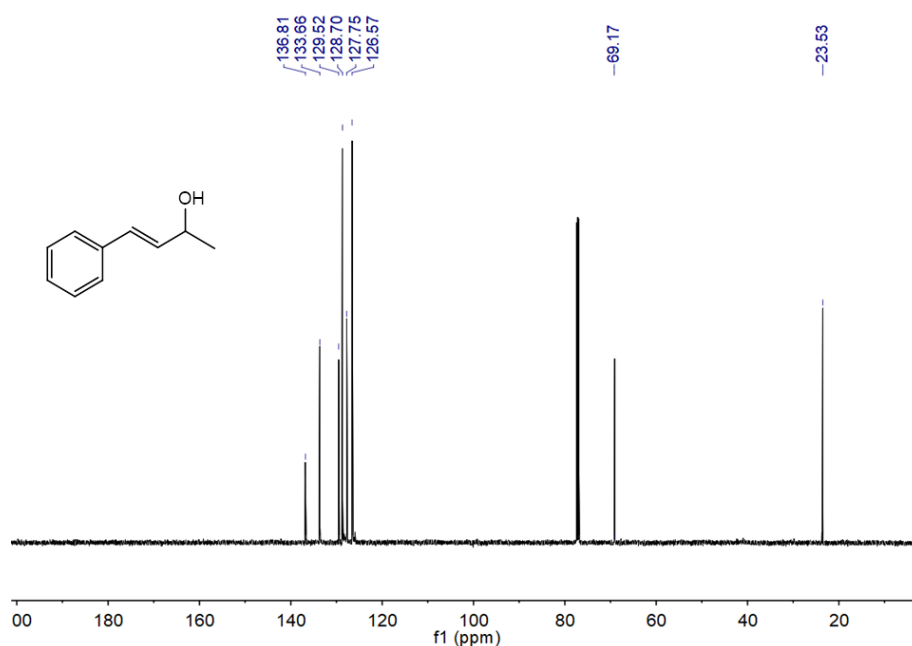

Fig. S73  $^{13}\text{C}\{^1\text{H}\}$  NMR spectrum of the isolated 4-phenyl-3-buten-2-ol (151 MHz,  $\text{CDCl}_3$ )



## Reference

- S1 Y. Tsuchido, R. Abe, M. Kamono, K. Tanaka, M. Tanabe and K. Osakada, *Bull. Chem. Soc. Jpn.*, 2018, **91**, 858–864.
- S2 M. Tanabe, M. Kamono, K. Tanaka and K. Osakada, *Organometallics*, 2017, **36**, 1929–1935.
- S3 Y. K. Kong, J. Kim, S. Choi and S.-B. Choi, *Tetrahedron Lett.*, 2007, **48**, 2033–2036.
- S4 W. R. Cullen, S. V. Evans, N. F. Han and J. Trotter, *Inorg. Chem.*, 1987, **26**, 514–519.
- S5 J. Chang, F. Fang, J. Zhang and X. Chen, *Adv. Synth. Catal.*, 2020, **362**, 2709–2715.
- S6 S. Chakraborty, J. A. Krause and H. Guan, *Organometallics*, 2009, **28**, 582–586.
- S7 P. Bhattacharya, J. A. Krause and H. Guan, *Organometallics*, 2011, **30**, 4720–4729.
- S8 X. Qi, H. Zhao, H. Sun, X. Li, O. Fuhr and D. Fenske, *New J. Chem.*, 2018, **42**, 16583–16590.
- S9 T. K. Mukhopadhyay, C. Ghosh, M. Flores, T. L. Groy and R. J. Trovitch, *Organometallics*, 2017, **36**, 3477–3483.
- S10 G. Liu, Y. Wang, B. Zhu, L. Zhang and C.-Y. Su, *New J. Chem.*, 2018, **42**, 11358–11363.
- S11 S. R. Tamang, D. Bedi, S. Shafiei-Haghighi, C. R. Smith, C. Crawford and M. Findlater, *Org. Lett.*, 2018, **20**, 6695–6700.
- S12 D. Cao, S. M. Xia, P. Pan, H. Zeng, C. J. Li and Y. Peng, *Green Chem.*, 2021, **23**, 7539–7543.
- S13 Y.-N. Duan, X. Du, Z. Cui, Y. Zeng, Y. Liu, T. Yang, J. Wen and X. Zhang, *J. Am. Chem. Soc.* 2019, **141**, 20424–20433.
- S14 T. K. Mukhopadhyay, C. L. Rock, M. Hong, D. C. Ashley, T. L. Groy, M.-H. Baik and R. J. Trovitch, *J. Am. Chem. Soc.*, 2017, **139**, 4901–4915.
- S15 R. Wang, Y. Yue, J. Qi, S. Liu and L. B. Xing, *J. Catal.*, 2021, **399**, 1–7.
- S16 S. Ren, S. Xie, T. Zheng, Y. Wang, S. Xu, B. Xue, X. Li, H. Sun, I. O. Fuhrd and D. Fensked, *Dalton Trans.*, 2018, **47**, 4352–4359.
- S17 S. Weber, J. Brunig, L. F. Veiros and K. Kirchner, *Organometallics*, 2021, **40**, 1388–1394.
- S18 W. Zhang, J. Du, G. Xu, H. Lin, G. Wang and M. Tao, *Green Chem.*, 2016, **18**, 2726–2735.
- S19 C. A. Swamy, P. A. Varenikov and G. de Rooter, *Organometallics*, 2020, **39**, 247–257.
- S20 L. Süsse, J. Hermeke and M. Oestreich, *J. Am. Chem. Soc.*, 2016, **138**, 6940–6943.
- S21 A. Horn and U. Kazmaier, *Org. Lett.*, 2019, **21**, 4595–4599.
